# Supplementary material for: Four-Dimensional Chromosome Structure Prediction
Source: MDPI journal article supplement (doi:10.3390/ijms22189785), 2021-09-10
Supplement: s1 [file s1]

# Supplementary Figures

|                                                                                 |           |
|---------------------------------------------------------------------------------|-----------|
| <b>Figure S1 Simulated Structure positions.</b>                                 | <b>3</b>  |
| <b>Figure S2 Synthetic Contact maps</b>                                         | <b>4</b>  |
| <b>Figure S3 iPSC 4DMax agreement with 3DMax.</b>                               | <b>5</b>  |
| <b>Figure S4 Synthetic Hi-C from 4D Structures</b>                              | <b>6</b>  |
| <b>Figure S5 Heat Maps Comparing iPSC reconstruction to iPSC Real Data</b>      | <b>11</b> |
| <b>Figure S7 Heat Maps Comparing Cardio Reconstruction</b>                      | <b>13</b> |
| <b>Figure S8 Interpolated Hi-C from iPSC 4D Structure</b>                       | <b>16</b> |
| <b>Figure S9 Interpolated Hi-C from Cardiomyocyte 4D Structures</b>             | <b>20</b> |
| <b>Figure S10 iPSC Contact Map Similarity</b>                                   | <b>21</b> |
| <b>Figure S11 Reconstructed iPSC Trajectory Curves</b>                          | <b>23</b> |
| <b>Figure S12 iPSC AB Interpolation Scatter Plots</b>                           | <b>24</b> |
| <b>Figure S13 Pearson Mats</b>                                                  | <b>30</b> |
| <b>Figure S14 4D Model Similarity of Interpolated iPSC and Full iPSC Models</b> | <b>31</b> |
| <b>Figure S15 4D Model Similarity of Interpolated Cardio and Cull Cardio</b>    | <b>32</b> |
| <b>Figure S16 Run Time</b>                                                      | <b>34</b> |
| <b>Figure S17 Cardio Schematic</b>                                              | <b>34</b> |
| <b>Figure S18 AB Vec Pearson Matrices</b>                                       | <b>40</b> |
| <b>Figure S19 Hyper Parameter Tuning</b>                                        | <b>42</b> |
| <b>Figure S20 Performance Comparison to Numerical Interpolation</b>             | <b>44</b> |
| <b>Videos</b>                                                                   | <b>45</b> |
| Video S1 Collection 1 Synthetic Videos                                          | 45        |
| Video S2 Collection 2 iPSC Videos                                               | 45        |
| Video S3 Collection 3 Cardio Videos                                             | 45        |
| Video S4 Collection 4 iPSC Missing Chros                                        | 45        |
| Video S5 Collection 5 Cardio Missing Chros                                      | 45        |
| Video S6 Collection 6 Changing Resolution                                       | 45        |
| Video S7 Collection 7 Changing Granularity                                      | 45        |

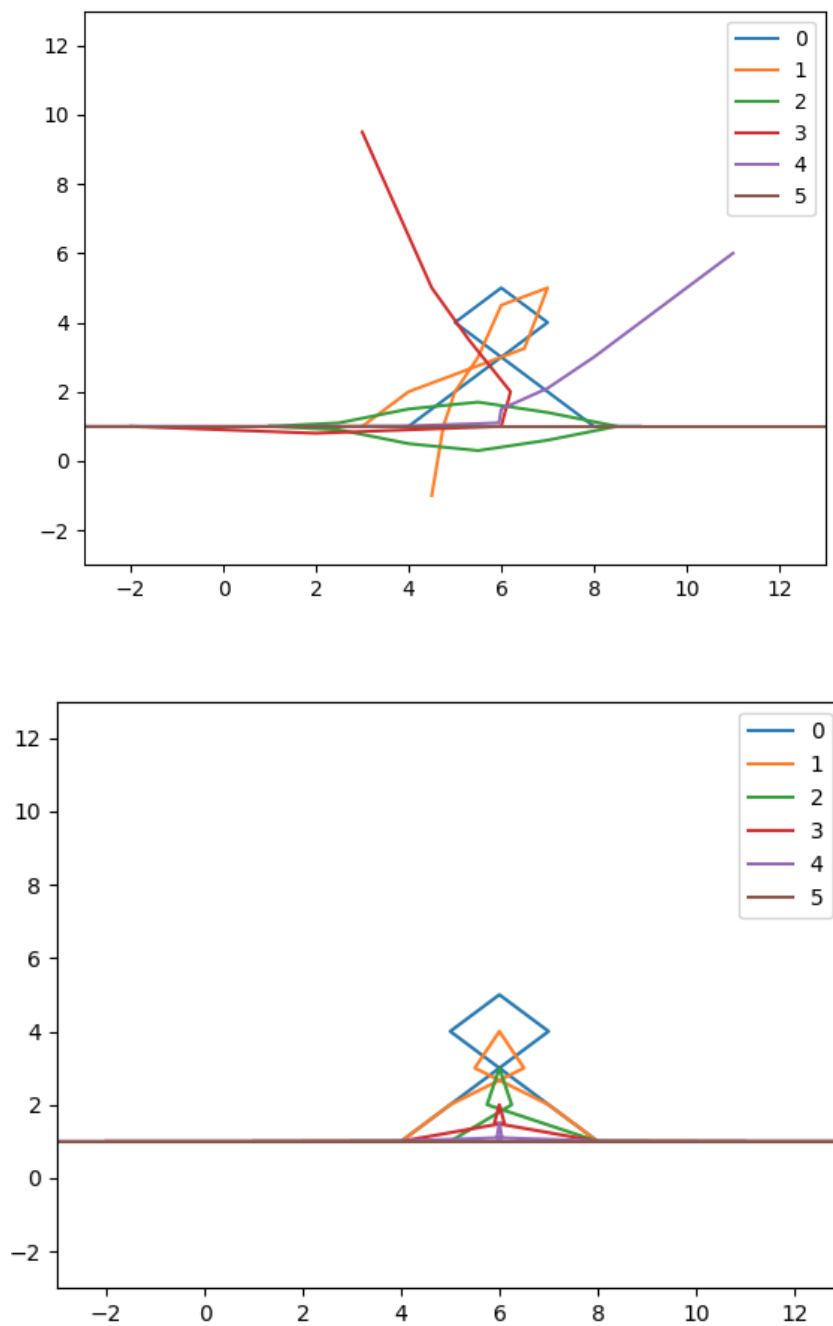

Figure S1 Simulated Structure positions.

Two dimensional projections of positions of synthetic chromosomes a. Structure 1. b. Structure 2. Each structure begins and ends with the same confirmation, but structure 1 is opened in a swinging motion while structure 2 is unraveled by both ends extending outward.

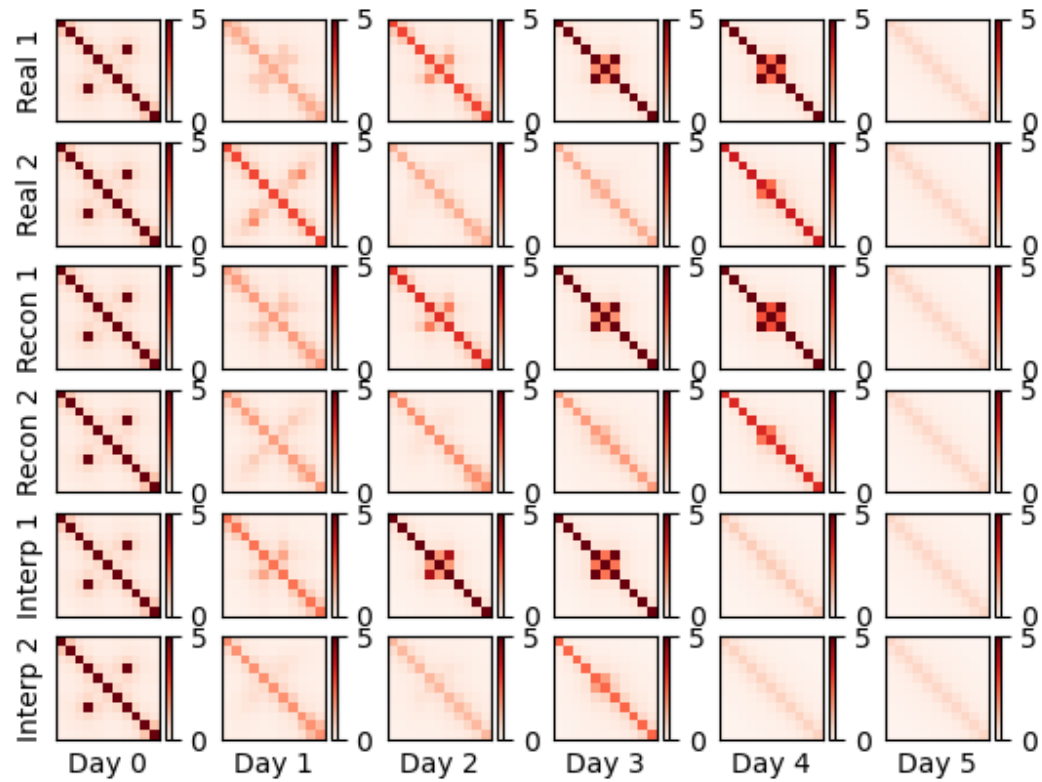

Figure S2 Synthetic Contact maps

Heatmaps of each day in each synthetic chromosome. The top 2 rows show heat maps of original synthetic data, middle two rows show heatmaps of 4DMax reconstructed structures and bottom two show interpolations if the algorithm 4DMax algorithm is not shown heat maps on given day.



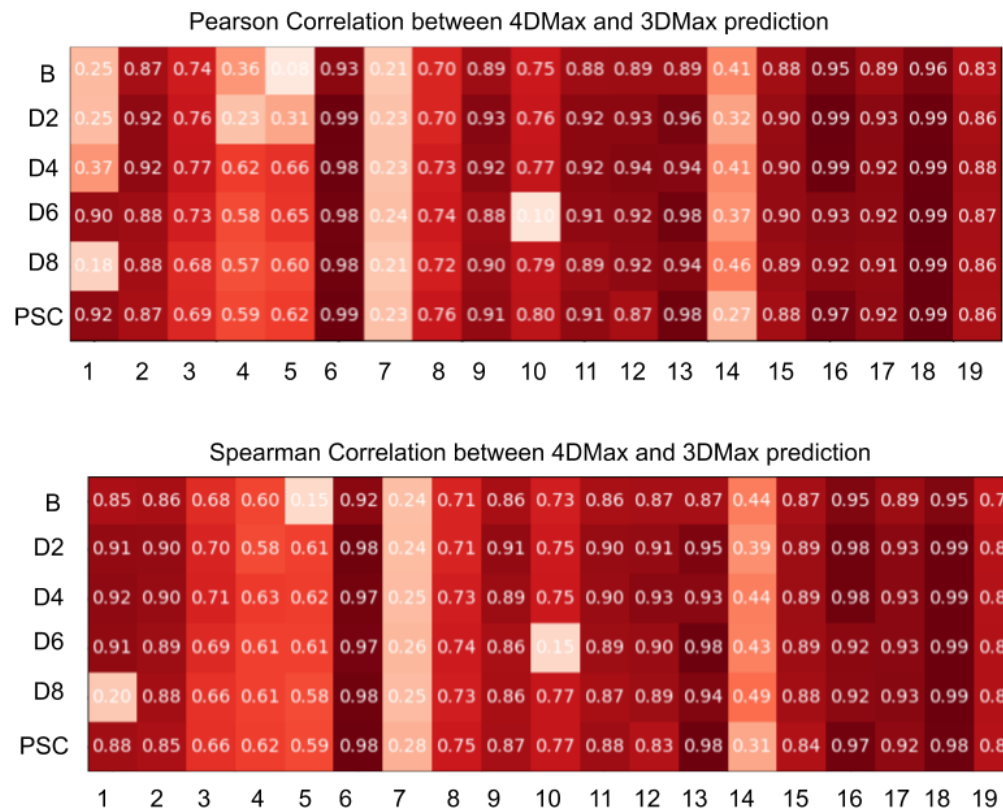

Figure S3 iPSC 4DMax agreement with 3DMax.

(a) pearson and (b) spearman correlation between 4DMax structures and 3D structure predicted using 3DMax algorithm.

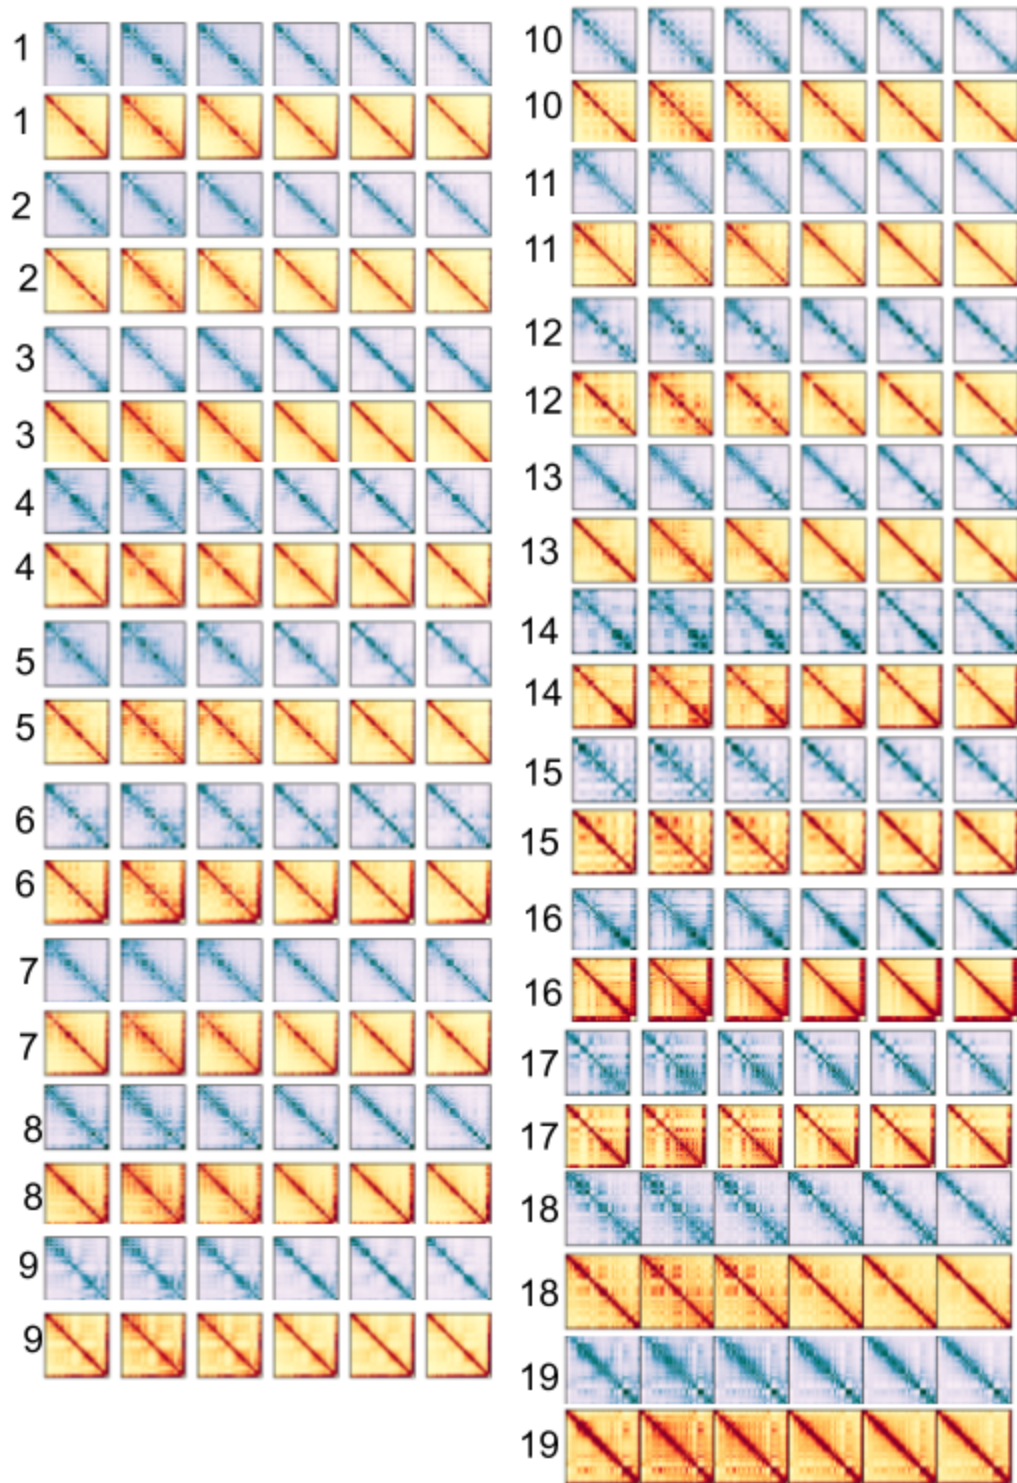

Figure S4 Synthetic Hi-C from 4D Structures

Chromosomal contact maps on each day for each chromosome in iPSC

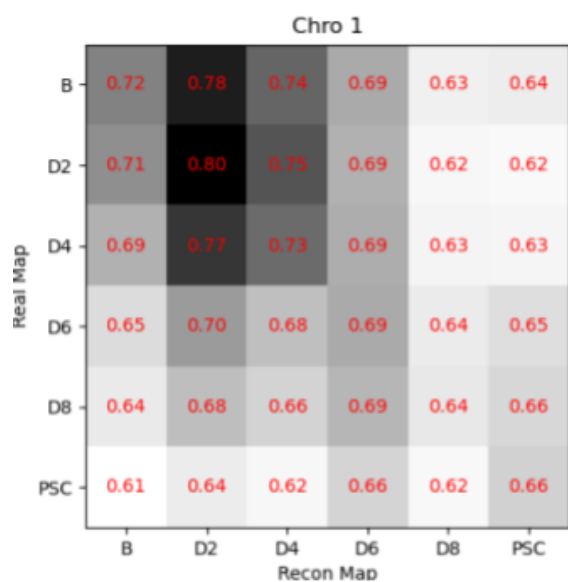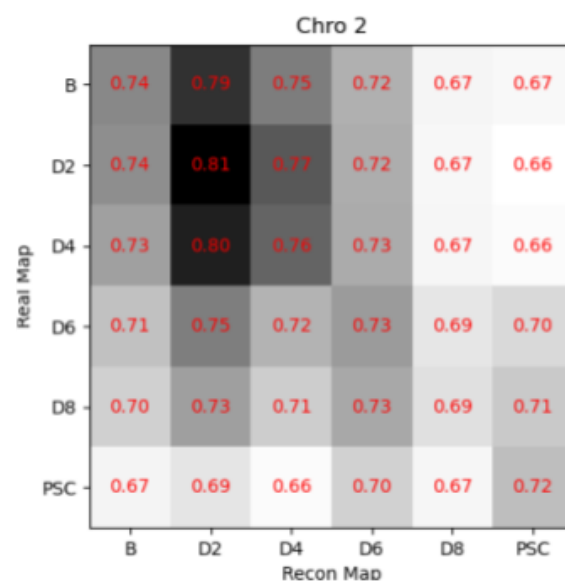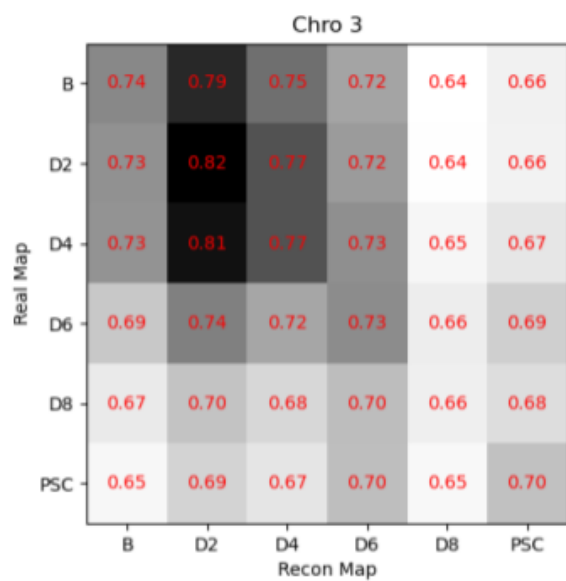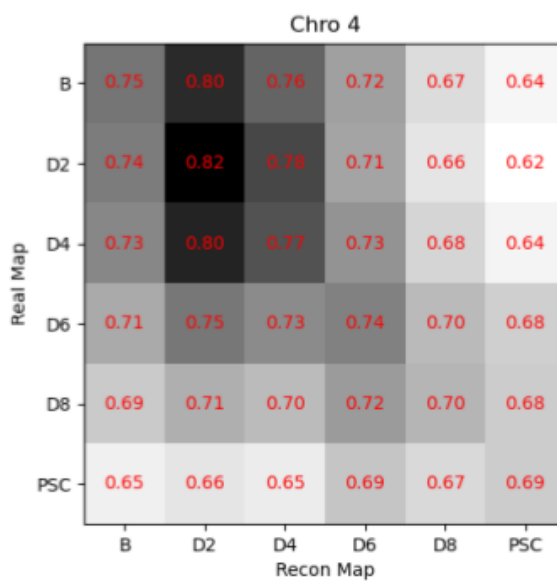

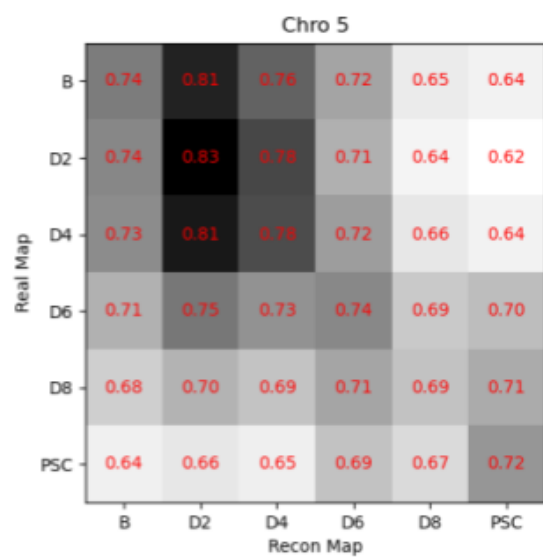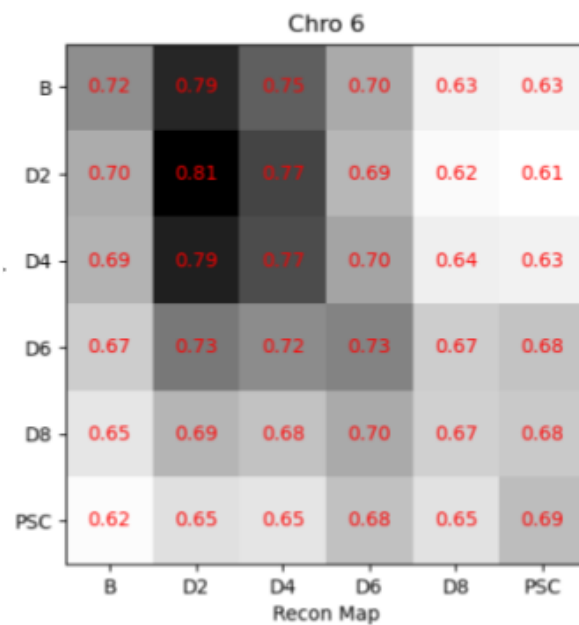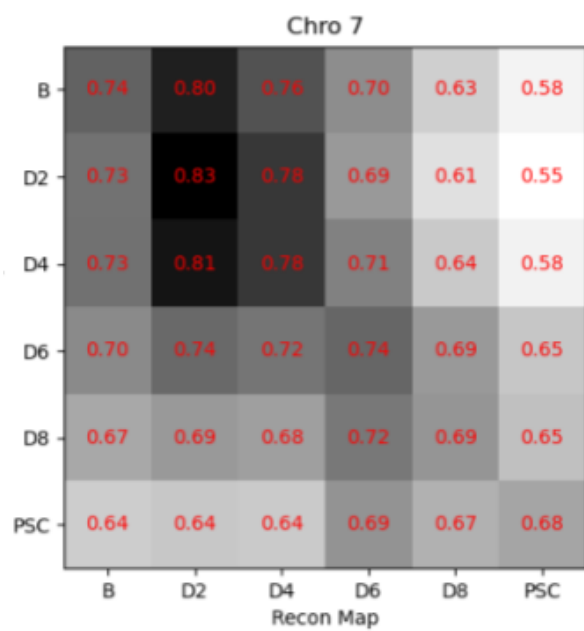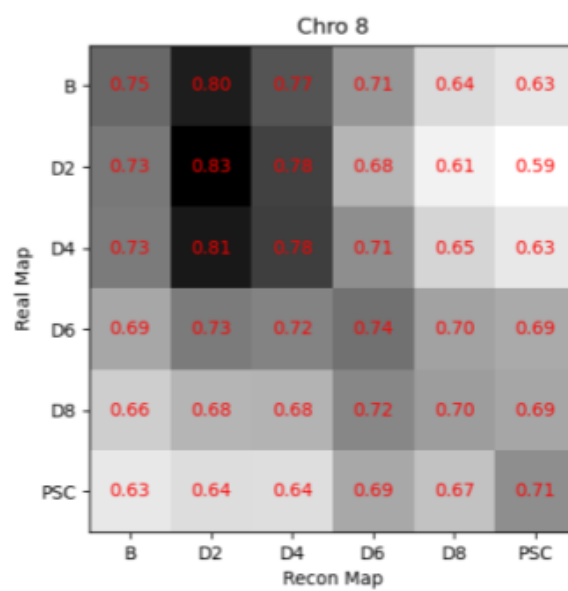

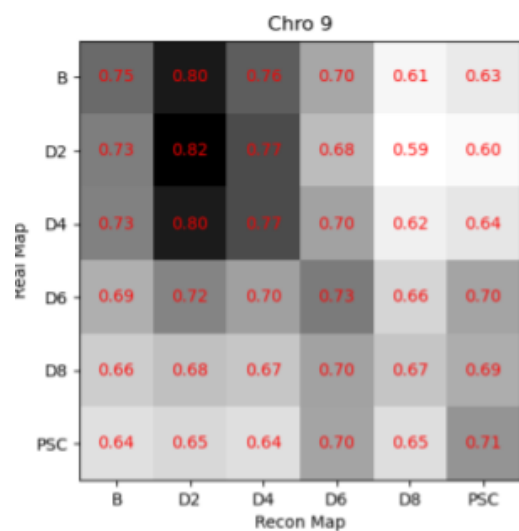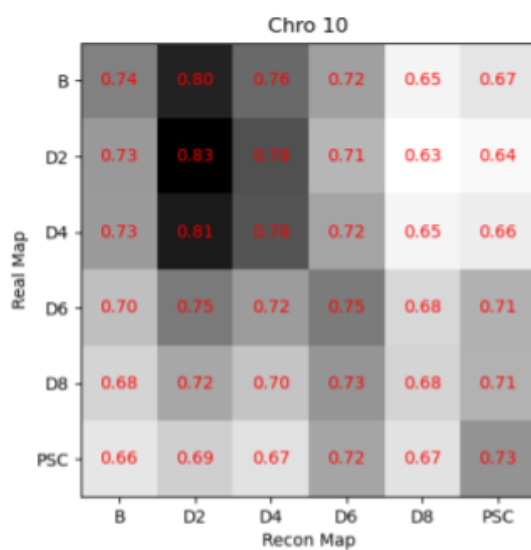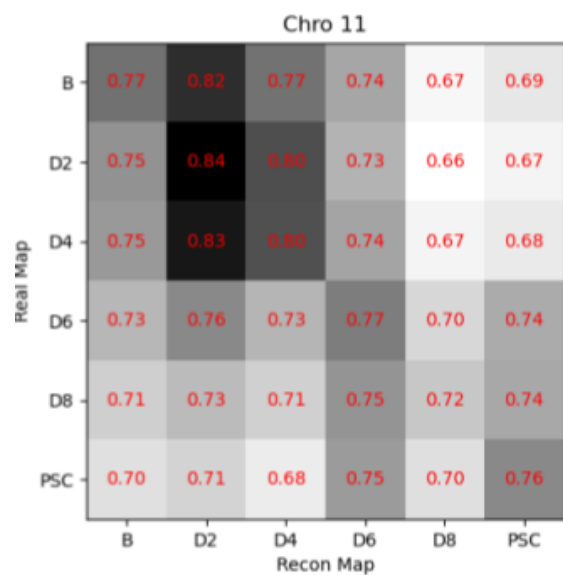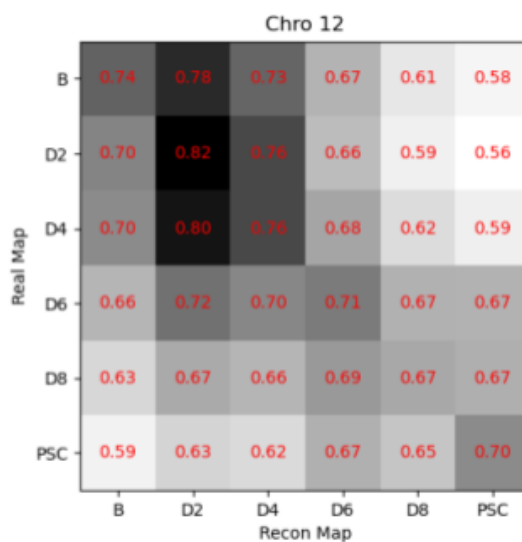

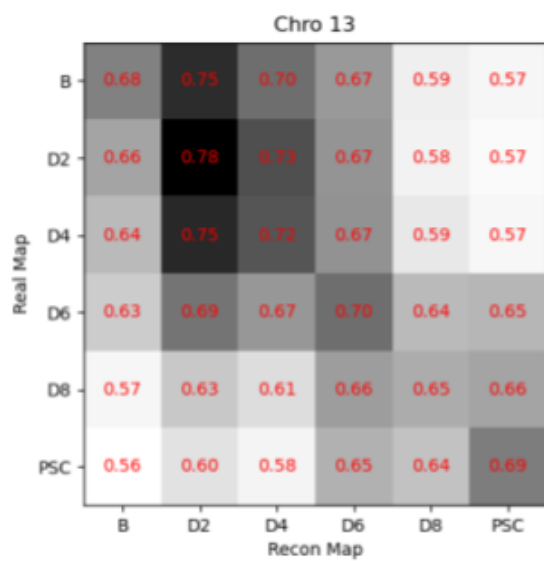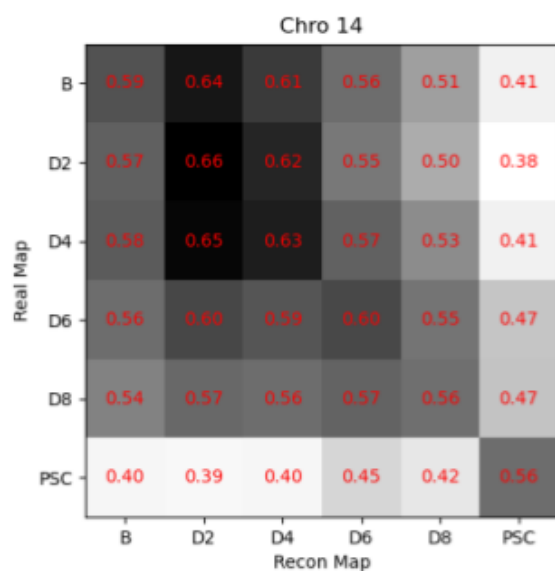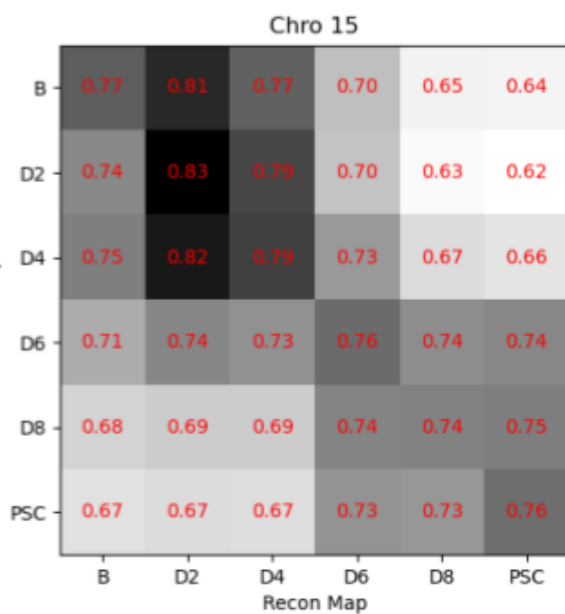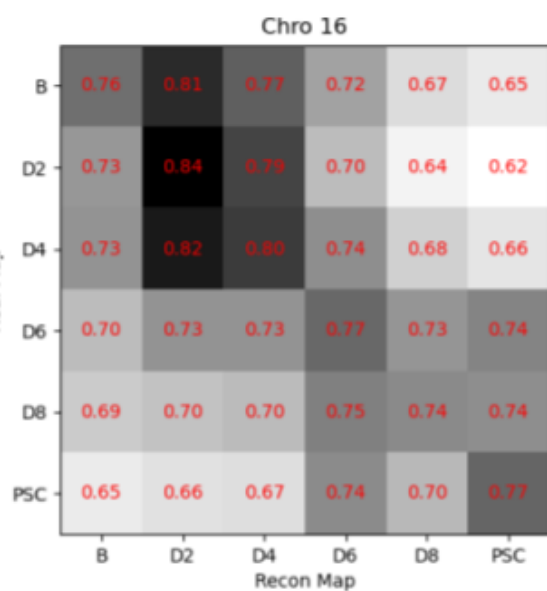

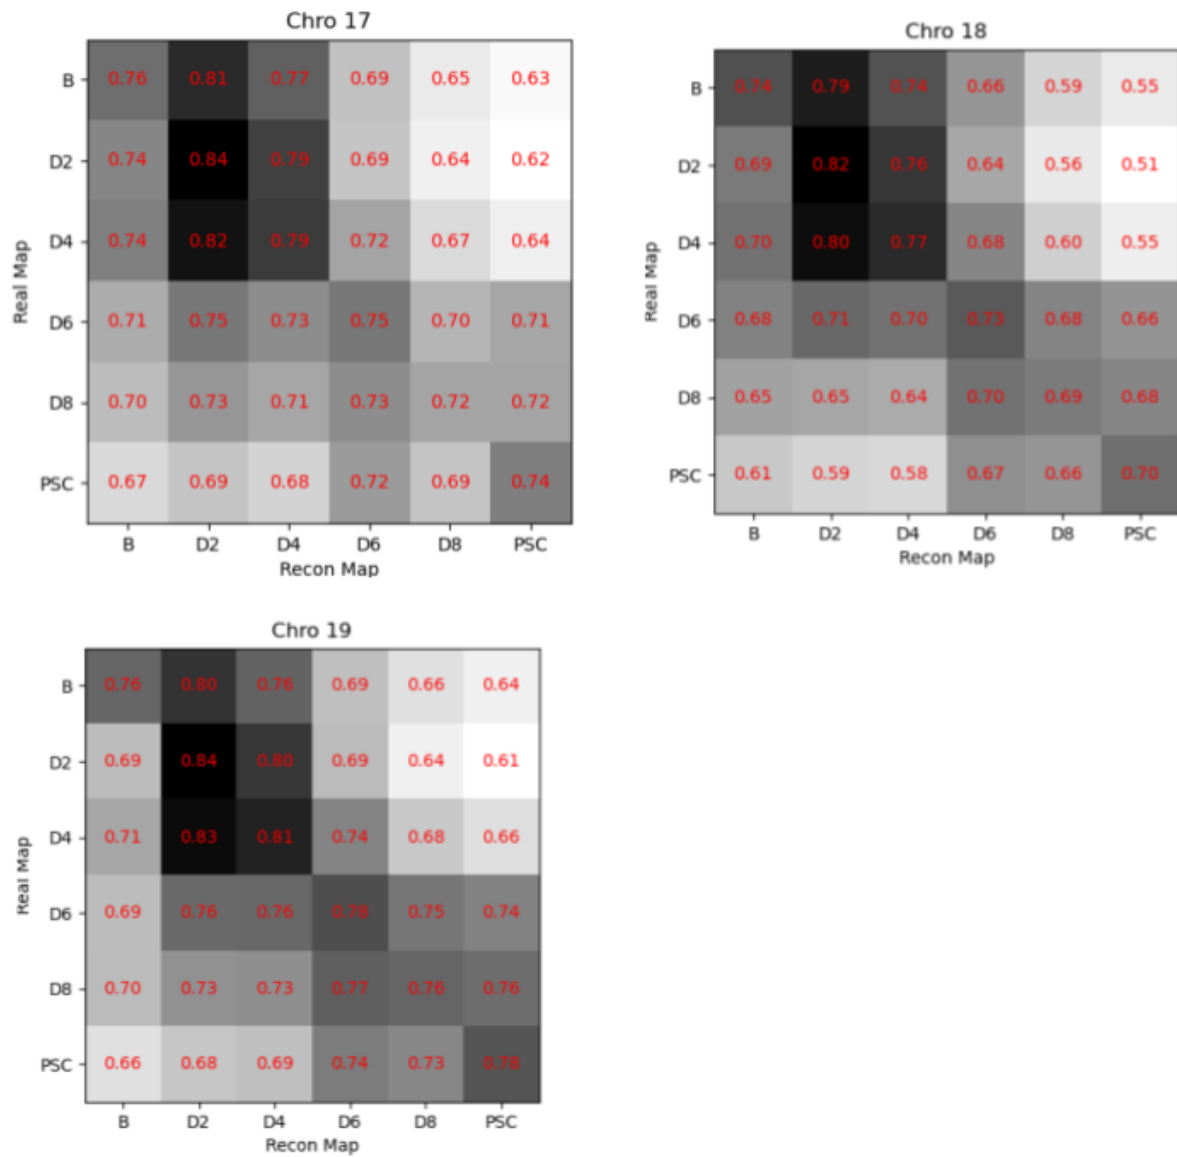

Figure S5 Heat Maps Comparing iPSC reconstruction to iPSC Real Data

Pearson correlation between real Hi-C contact maps and 4d reconstructed maps.

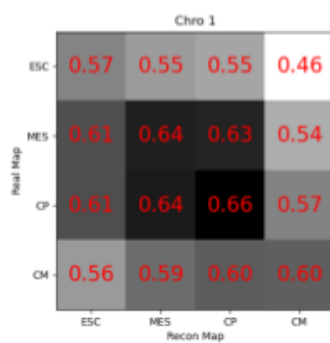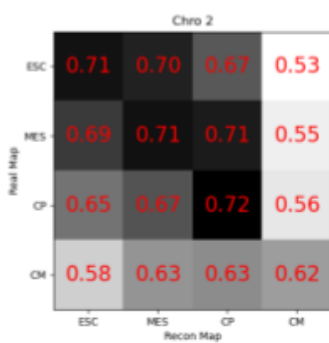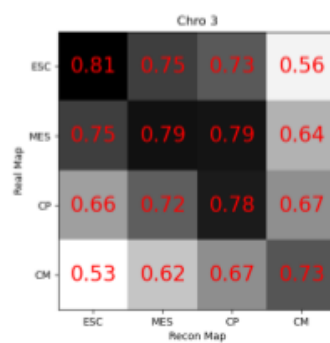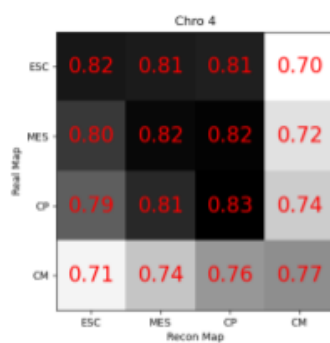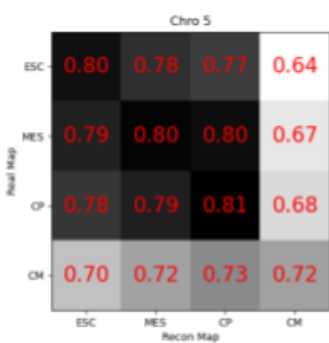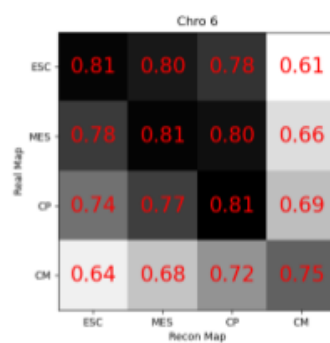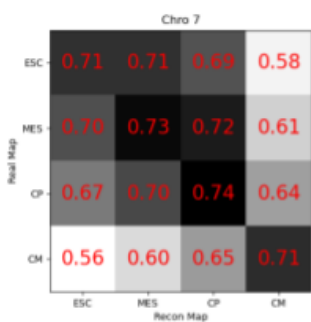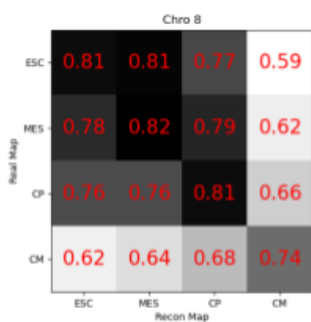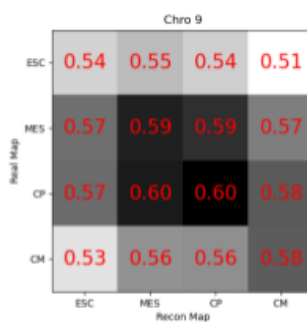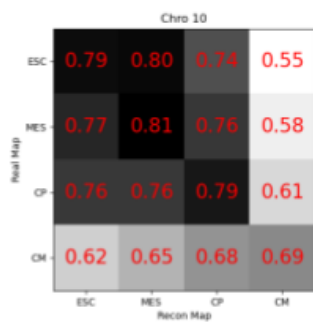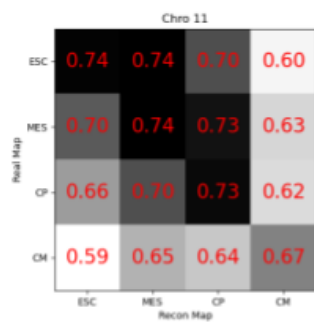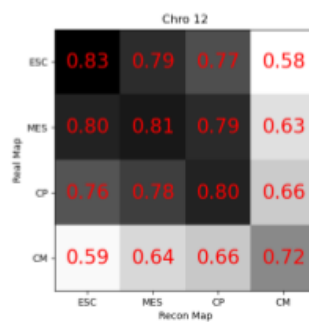



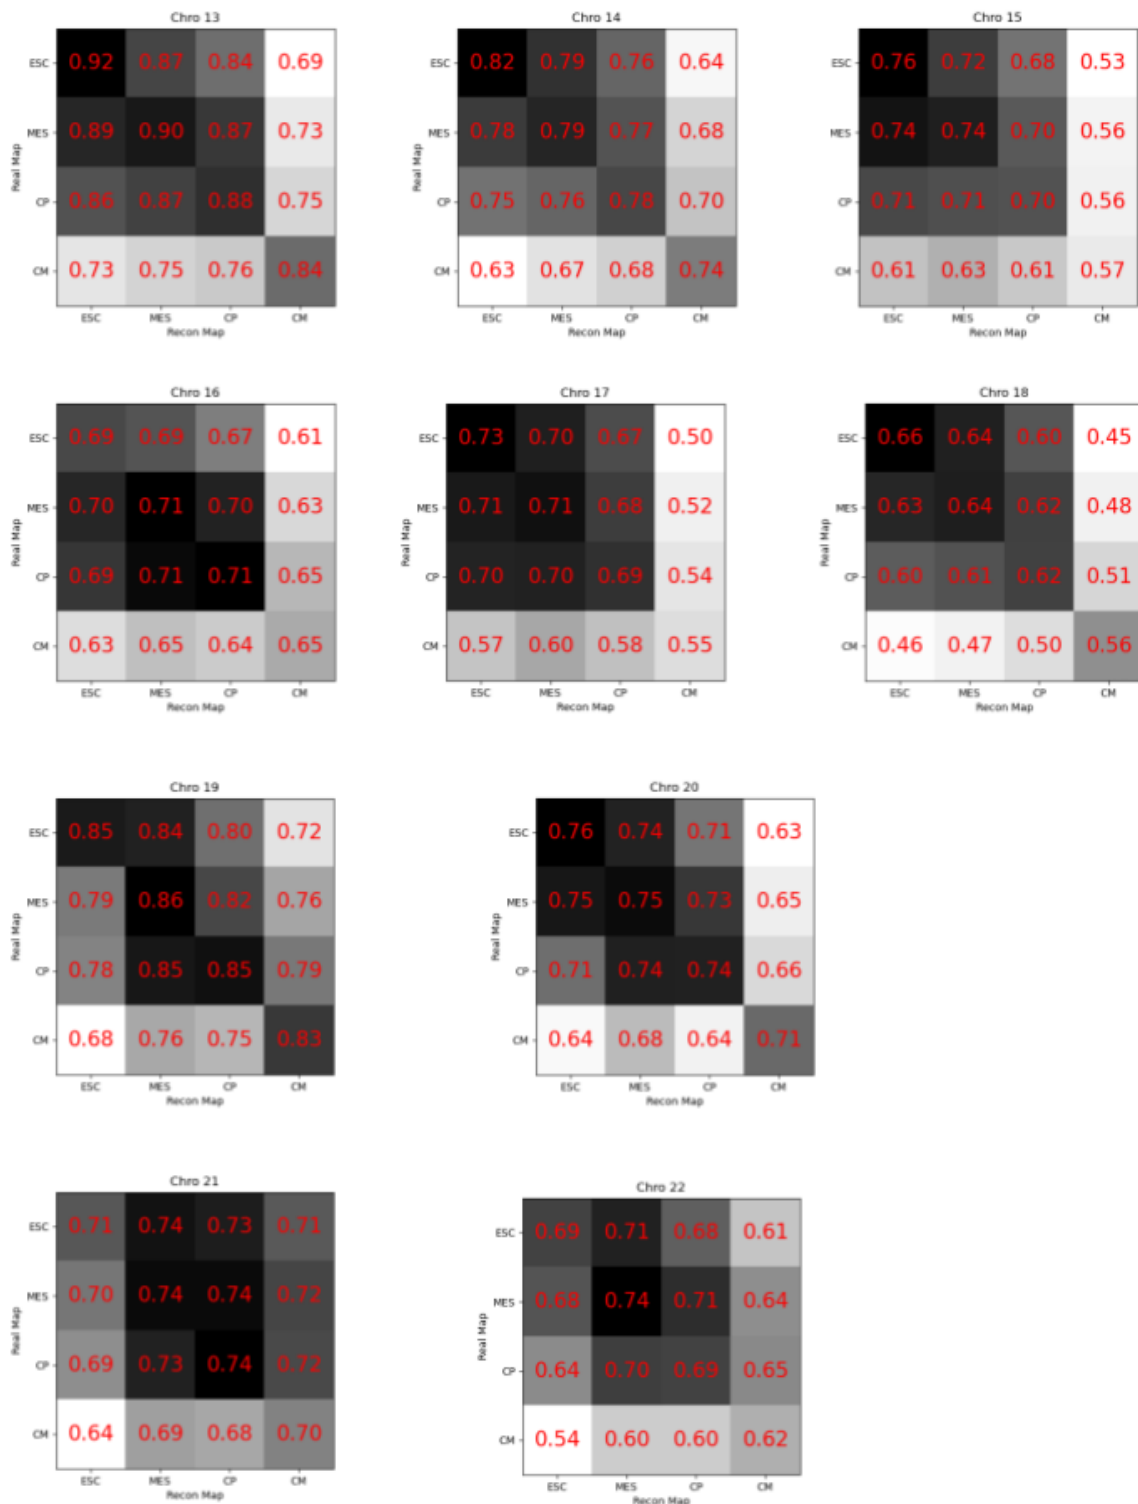

Figure S7 Heat Maps Comparing Cardio Reconstruction

Pearson correlation between real Hi-C contact maps and 4d reconstructed maps.

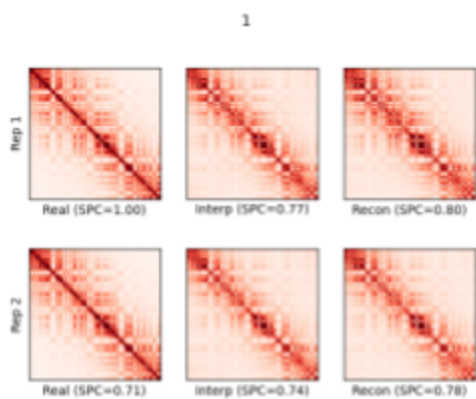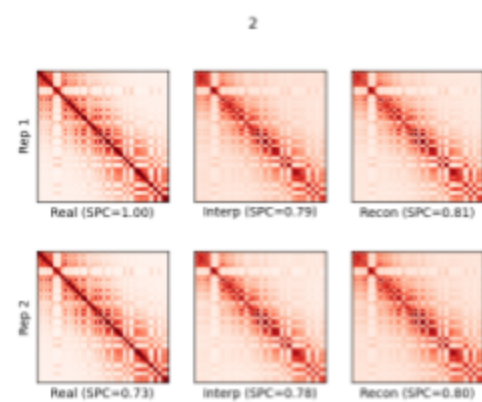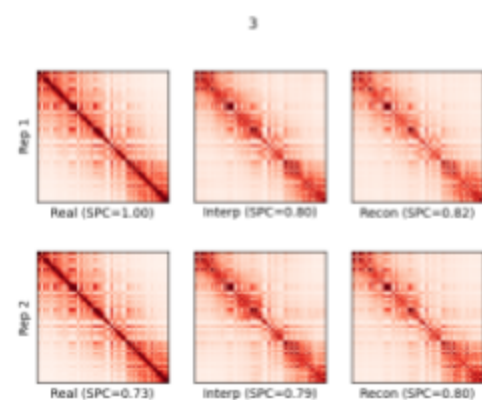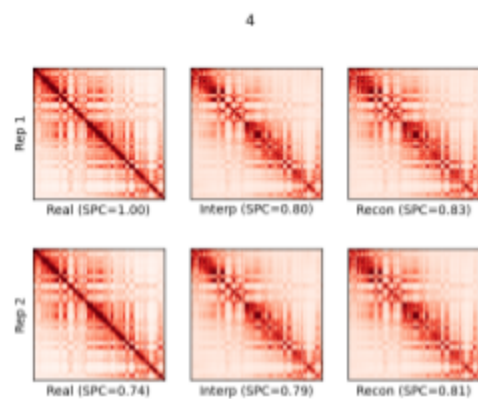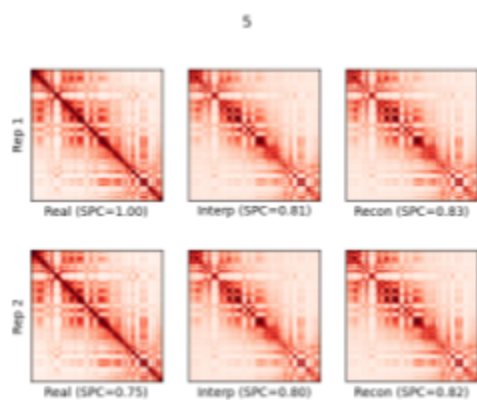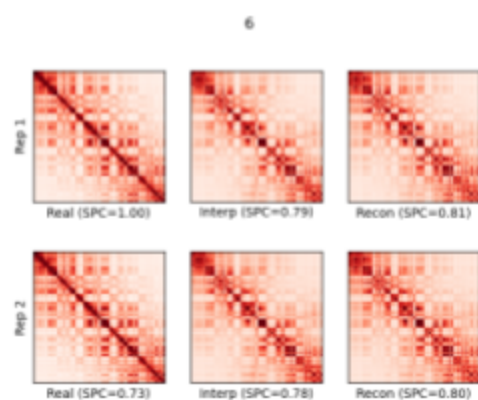

7

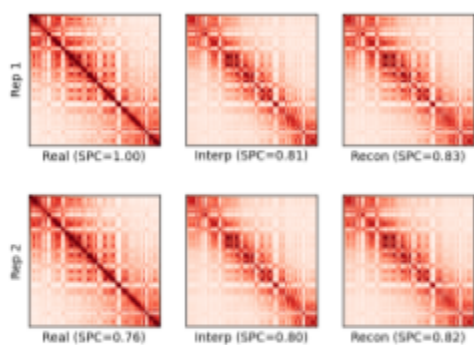

8

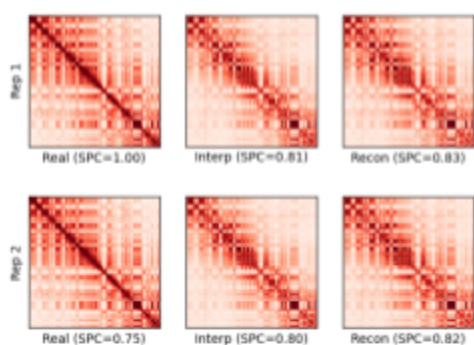

9

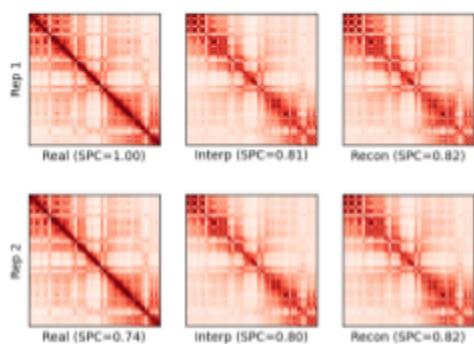

10

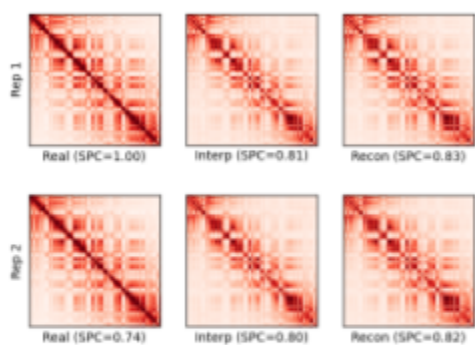

11

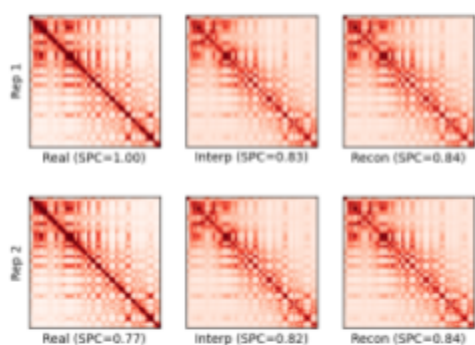

12

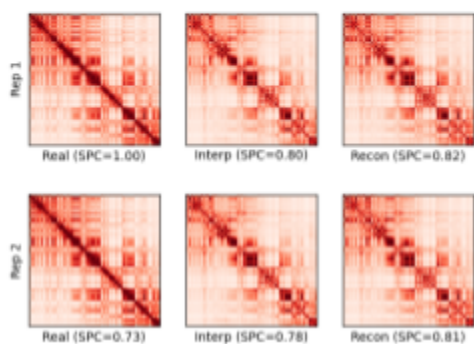

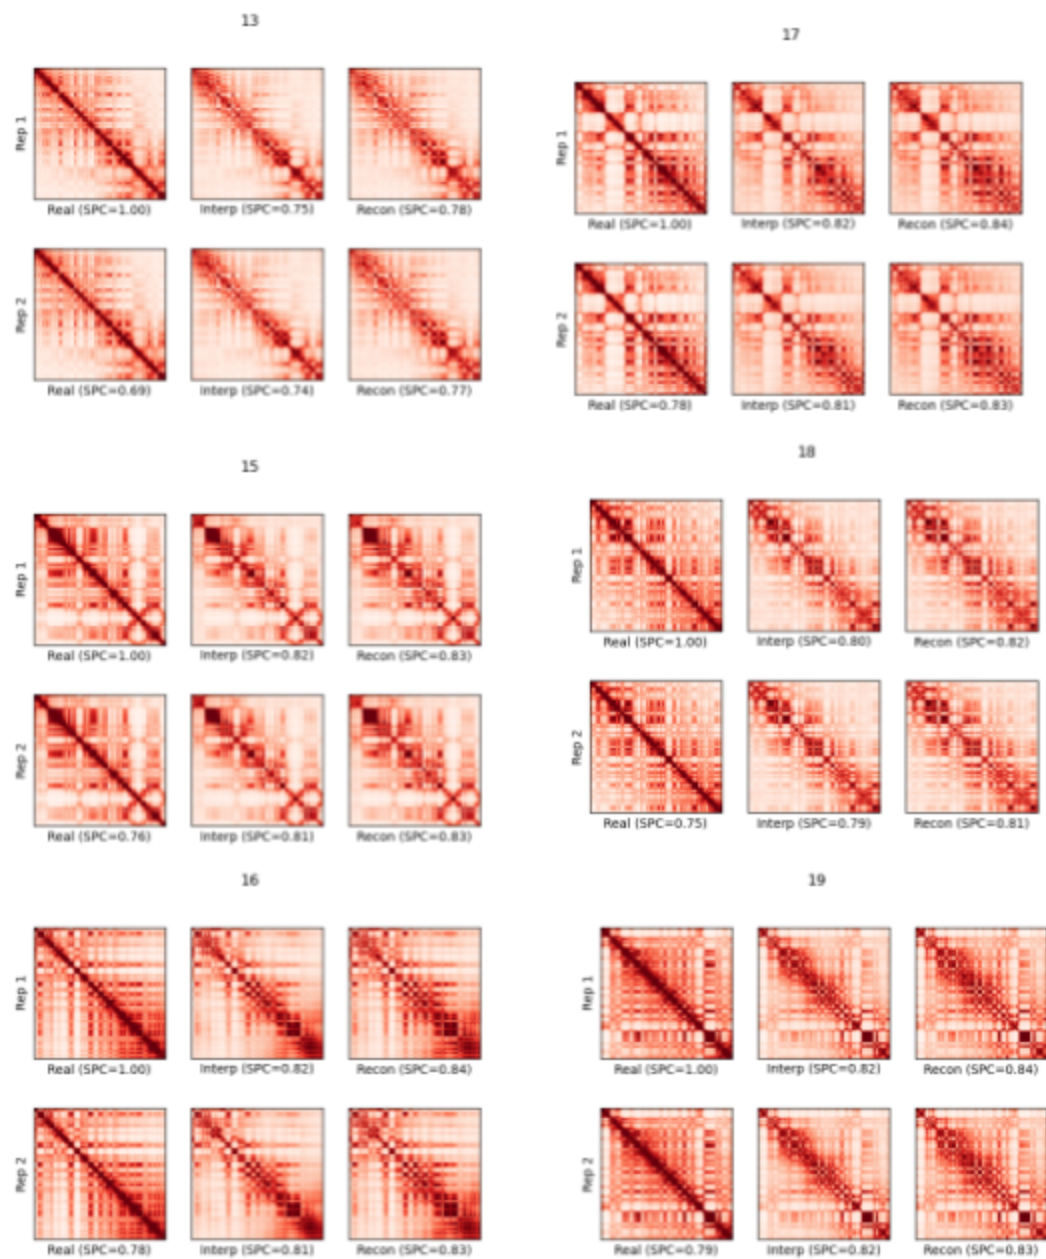

Figure S8 Interpolated Hi-C from iPSC 4D Structure

(left) Real Hi-C (middle) reconstructed Hi-C contact maps (right) interpolated contact maps.



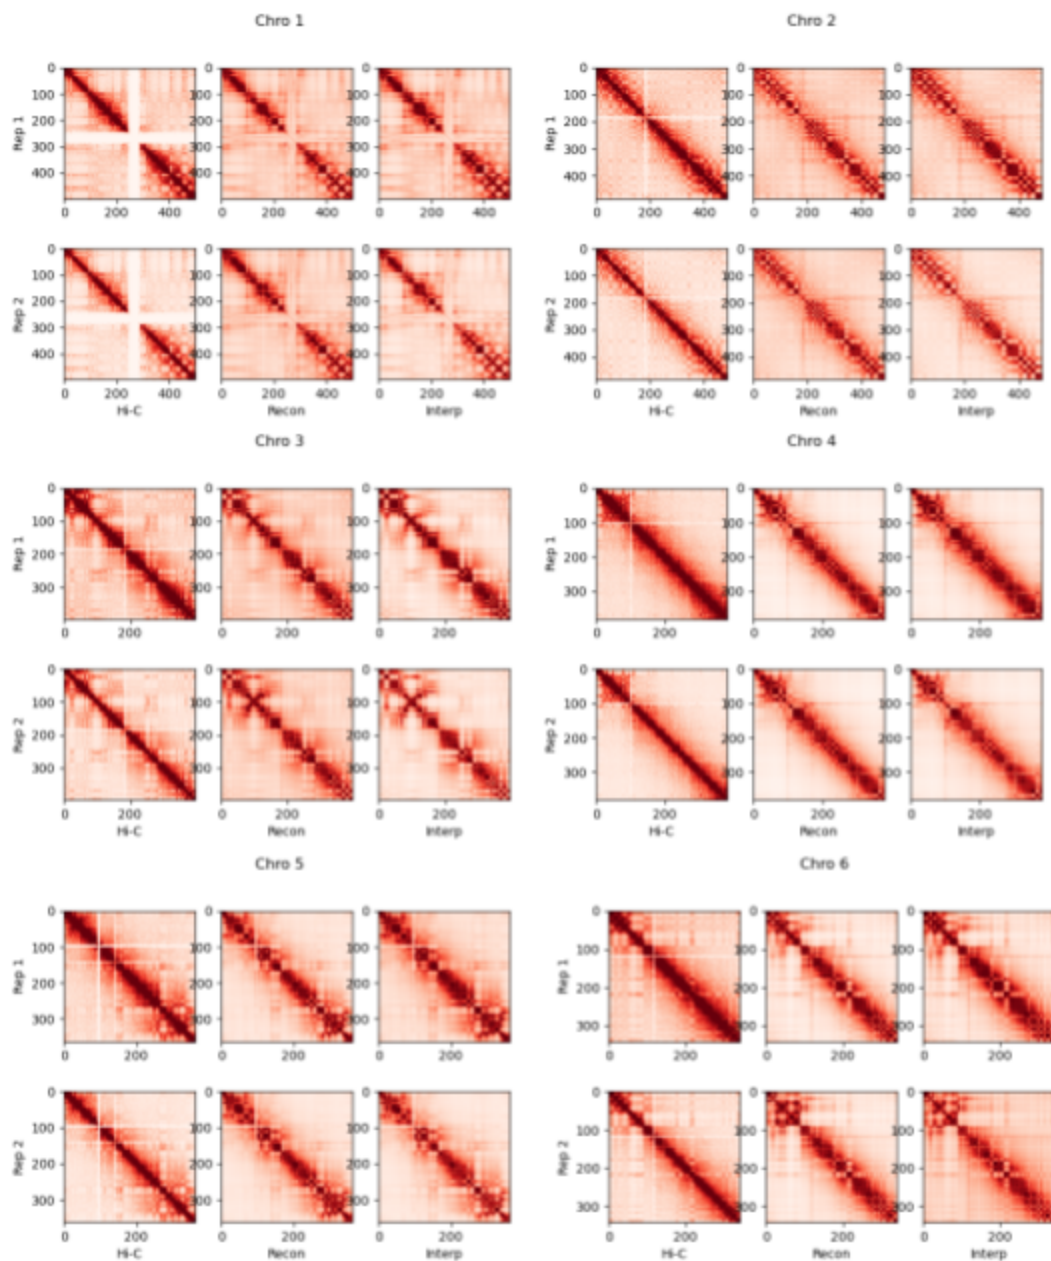

Chro 7

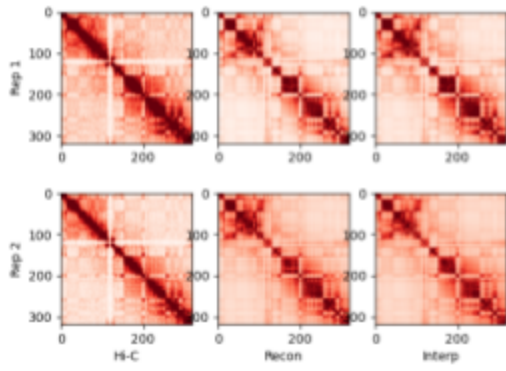

Chro 8

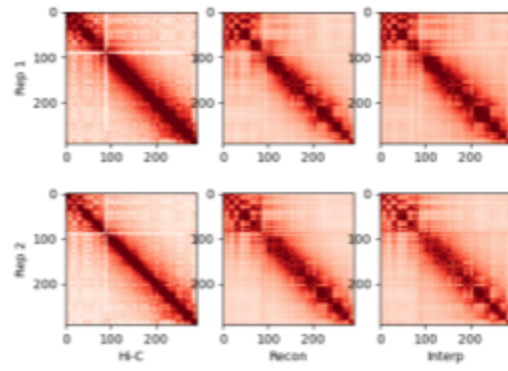

Chro 9

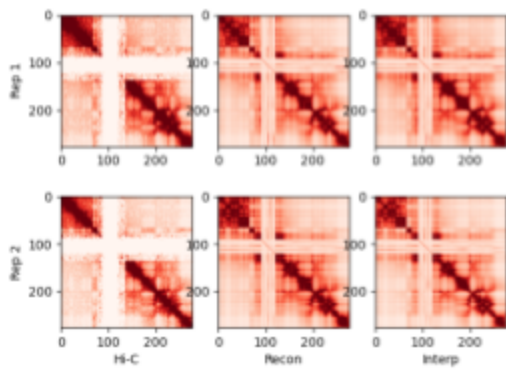

Chro 10

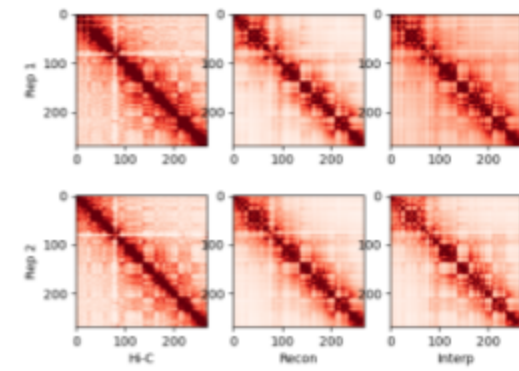

Chro 11

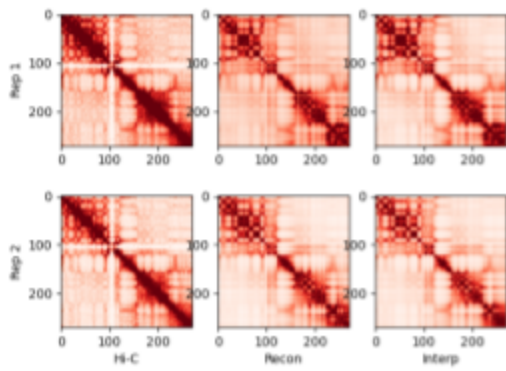

Chro 12

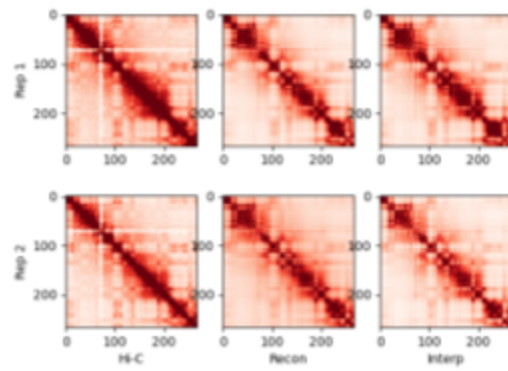

Chro 13

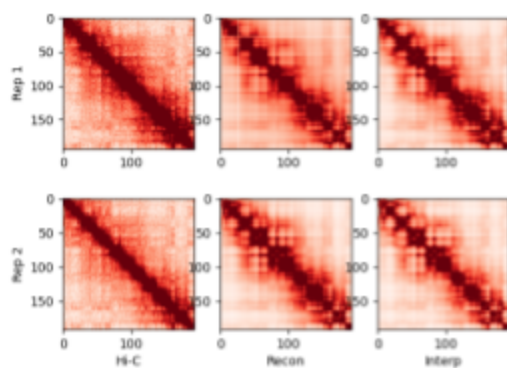

Chro 14

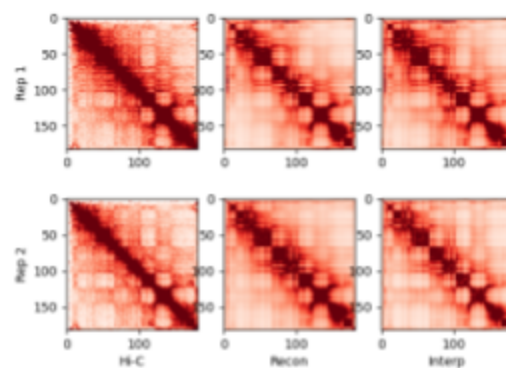

Chro 15

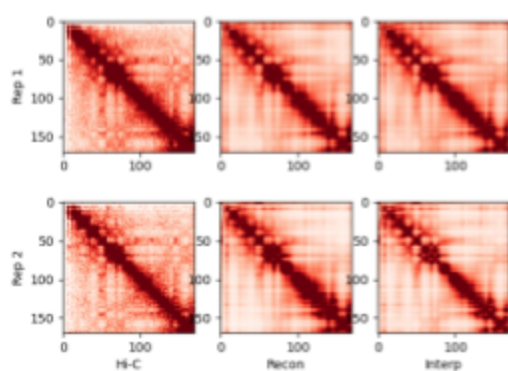

Chro 16

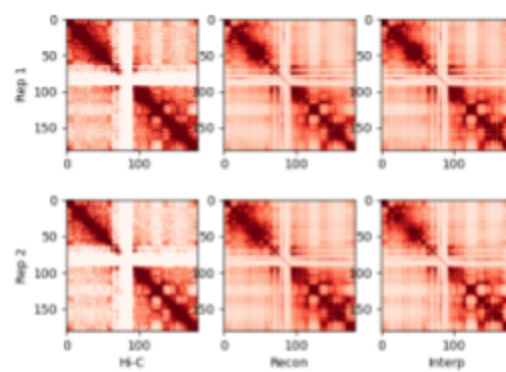

Chro 17

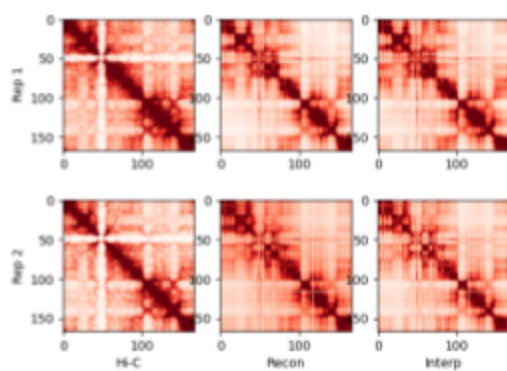

Chro 18

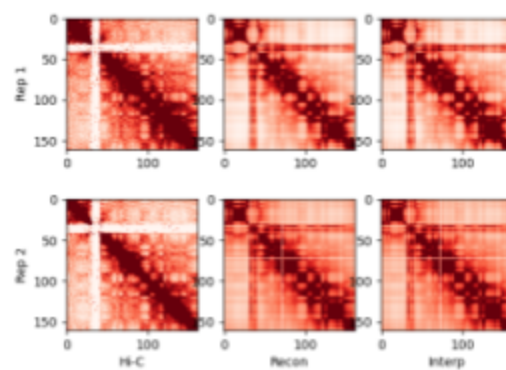

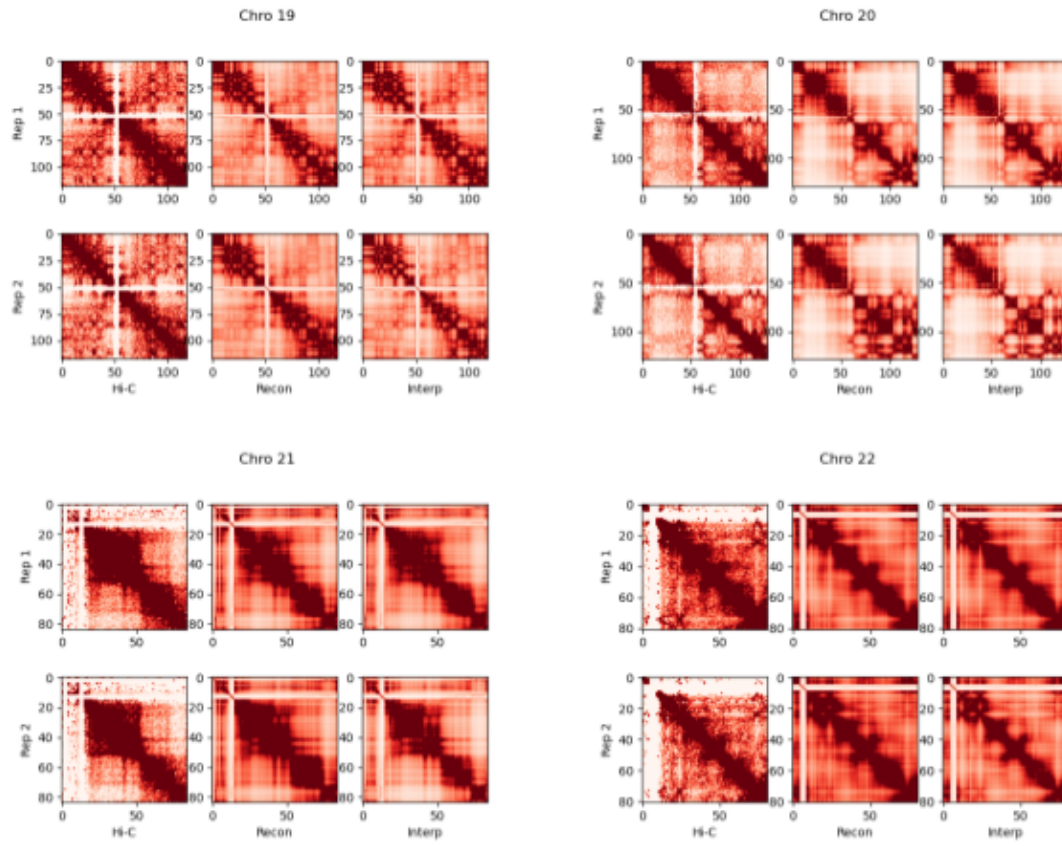

Figure S9 Interpolated Hi-C from Cardiomyocyte 4D Structures

(left) Real Hi-C (middle) reconstructed Hi-C contact maps (right) interpolated contact maps.



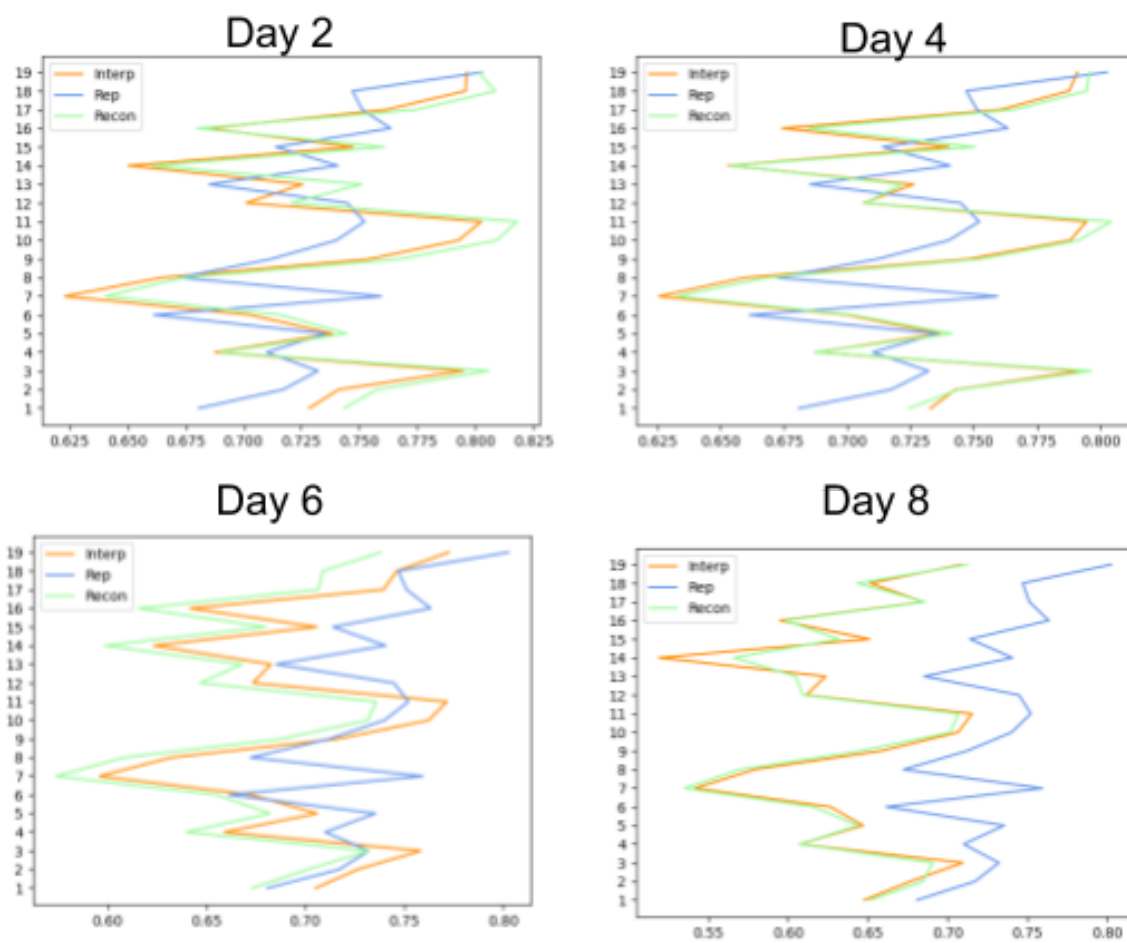

Figure S10 iPSC Contact Map Similarity

(orange) interpolation (green) reconstruction and (blue) biological replication.

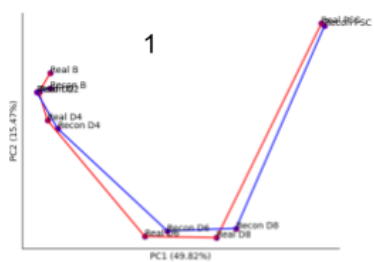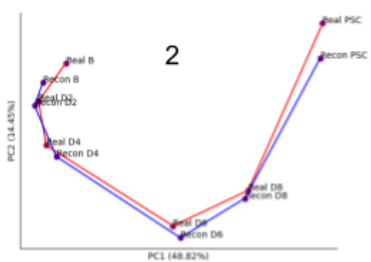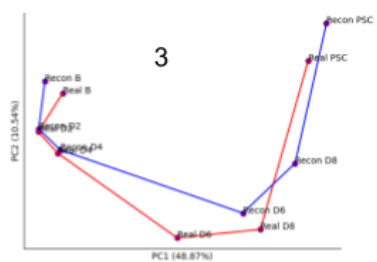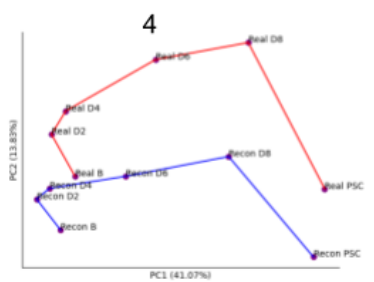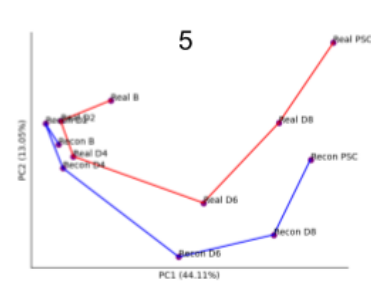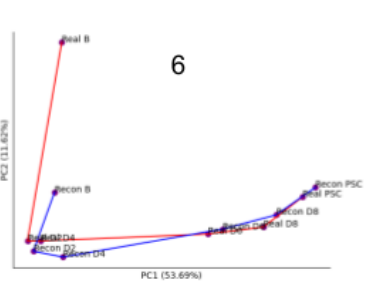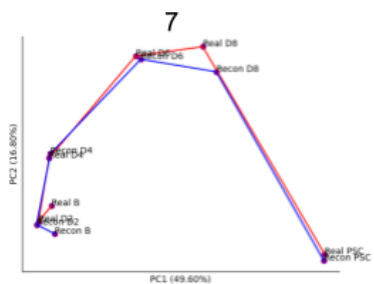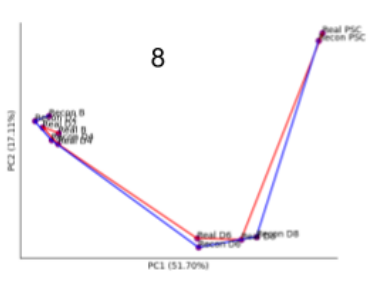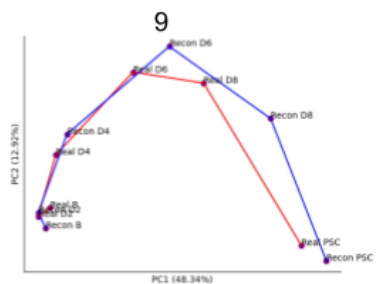

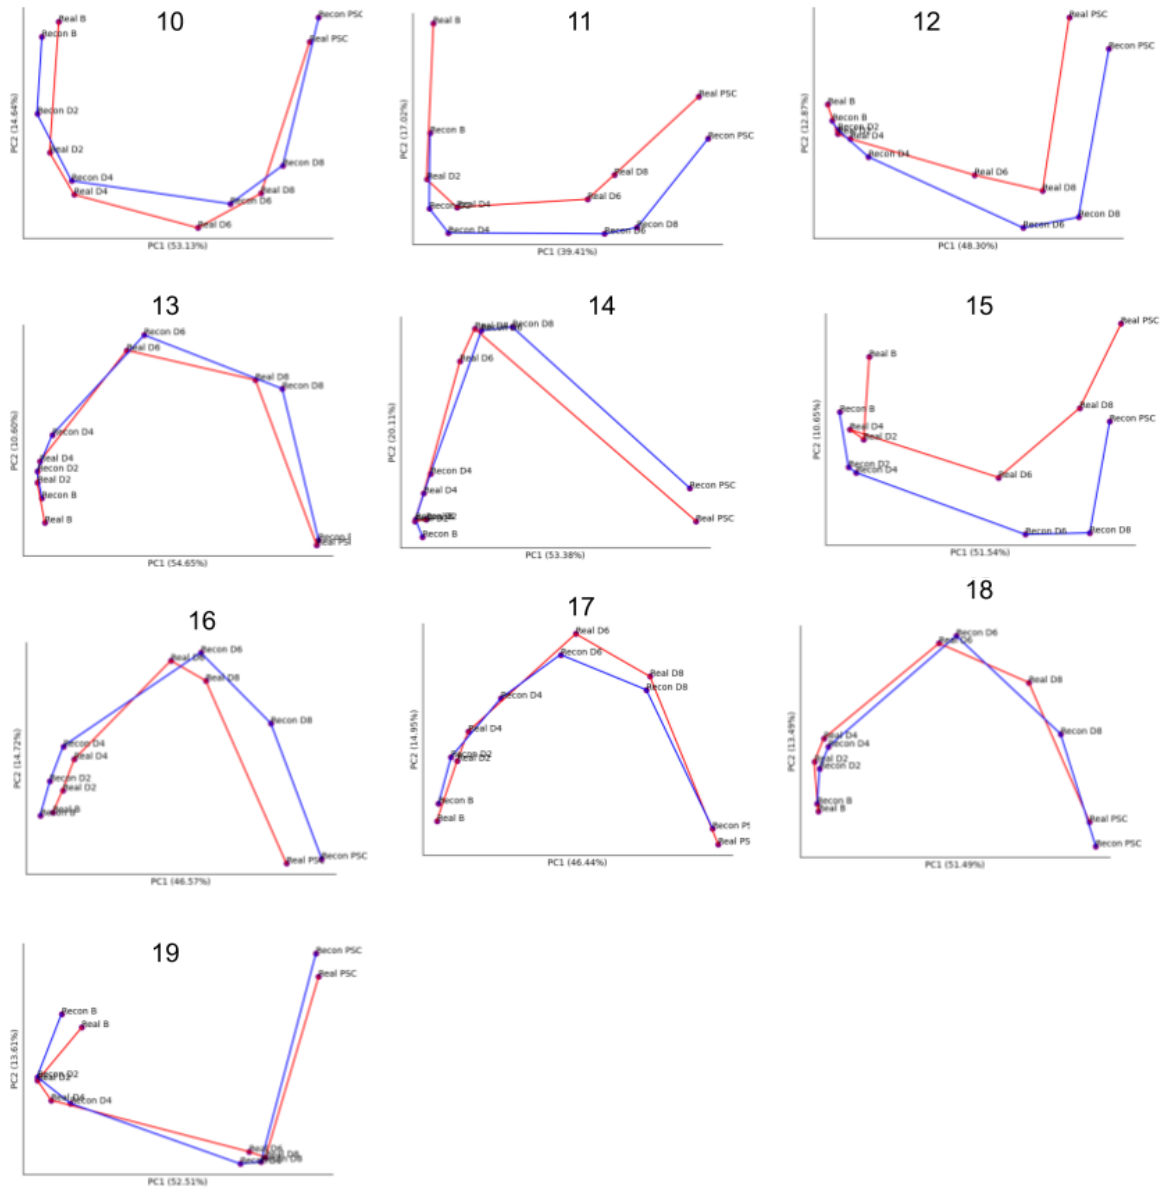

Figure S11 Reconstructed iPSC Trajectory Curves

(red) real Hi-C Trajectory (blue) Reconstructed Hi-C trajectory

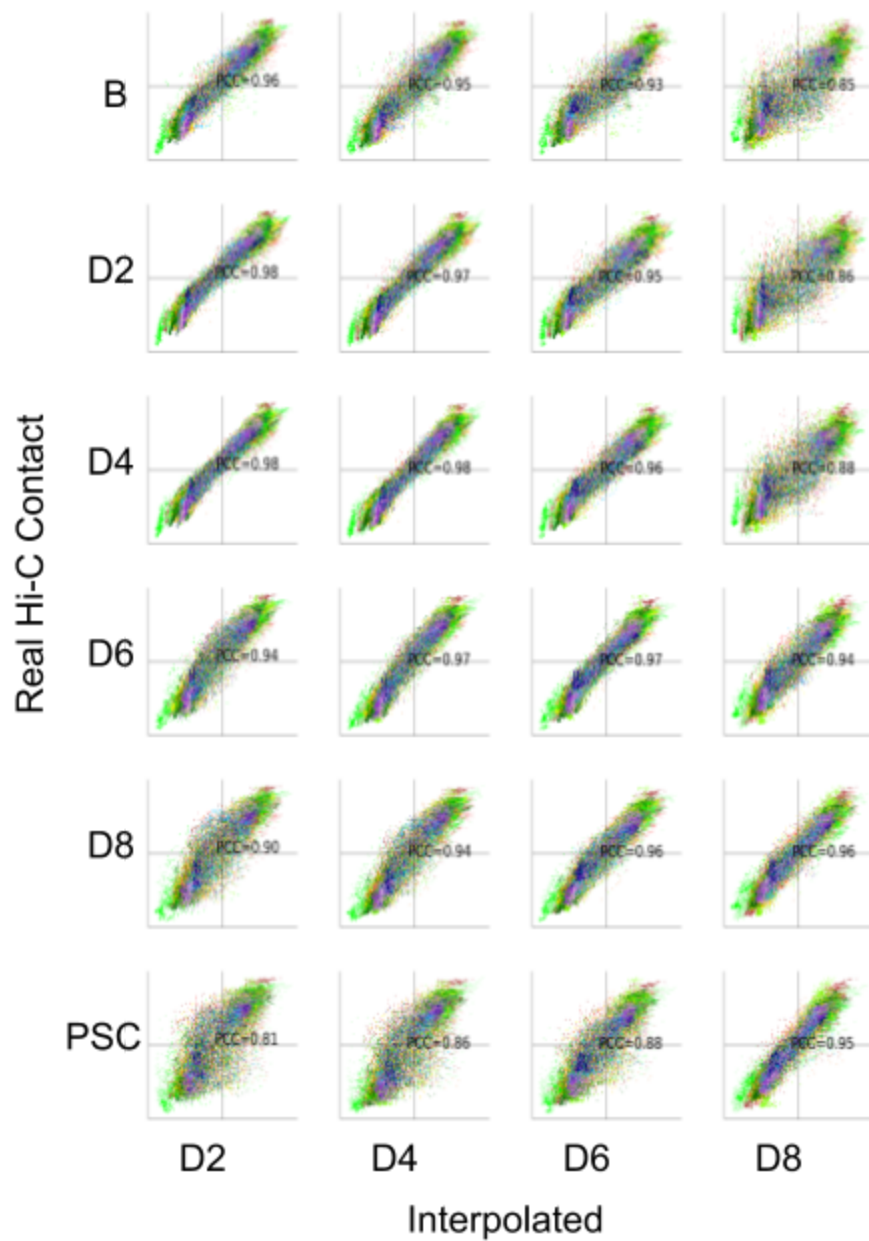

Figure S12 iPSC AB Interpolation Scatter Plots

Scatter plot of PC1 values from interpolated and biological real Hi-C contact maps.

Chro 1

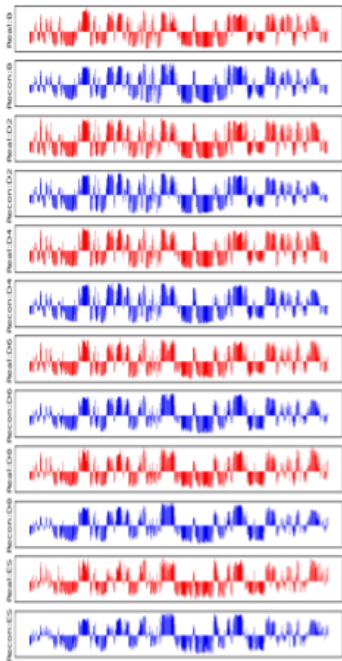

Chro 2

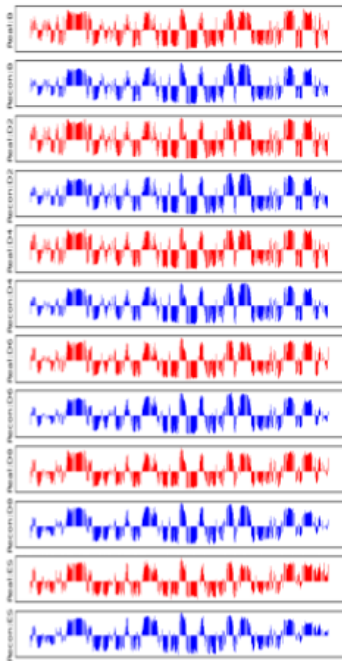

Chro 3

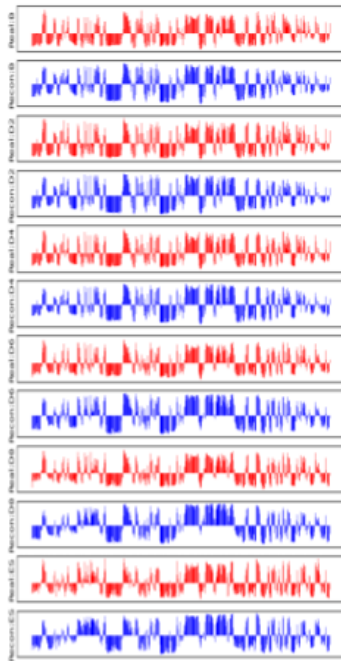

Chro 4

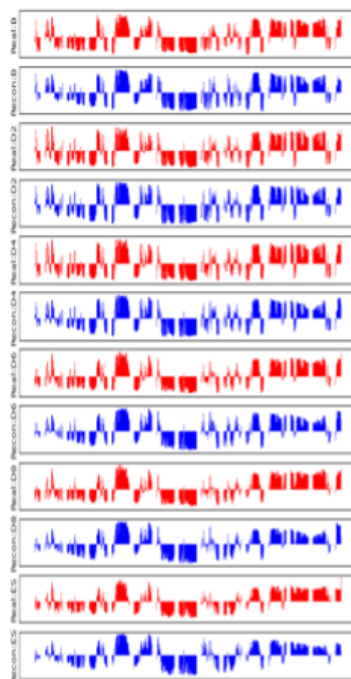

Chro 5

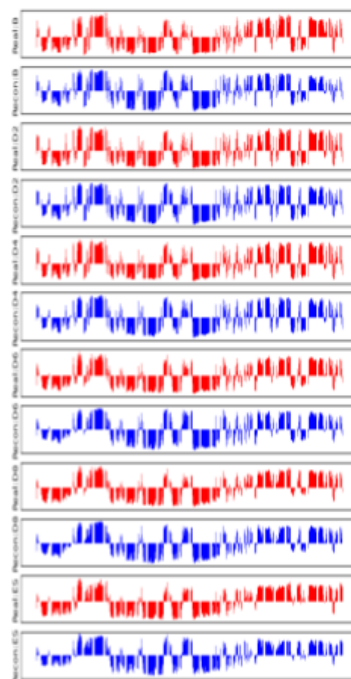

Chro 6

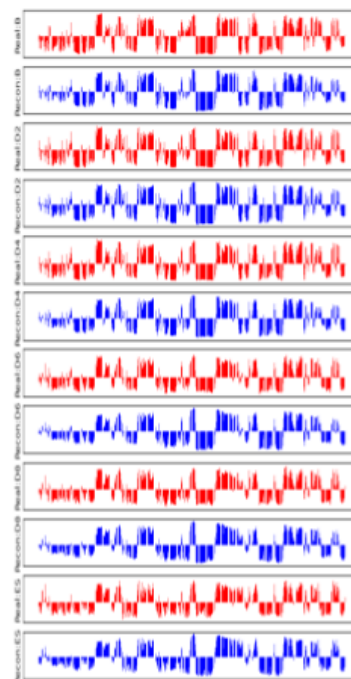

Chro 7

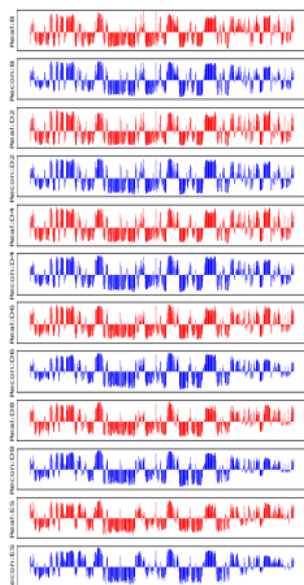

Chro 8

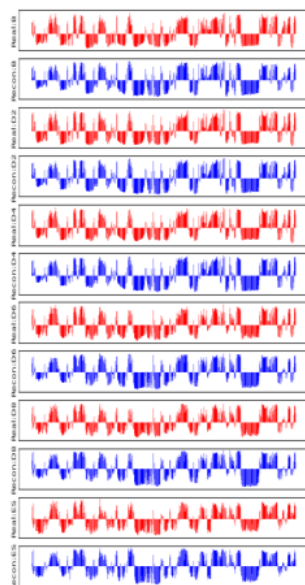

Chro 9

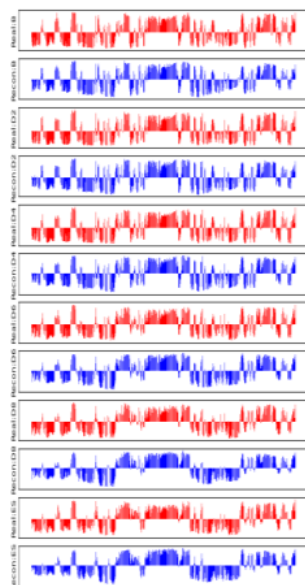

Chro 10

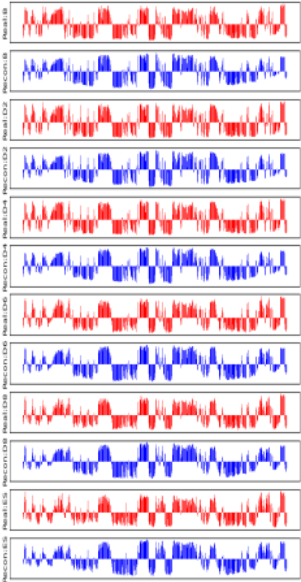

Chro 11

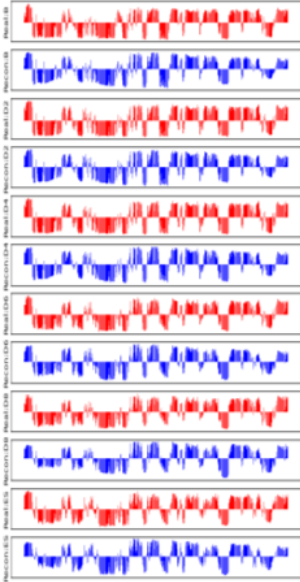

Chro 12

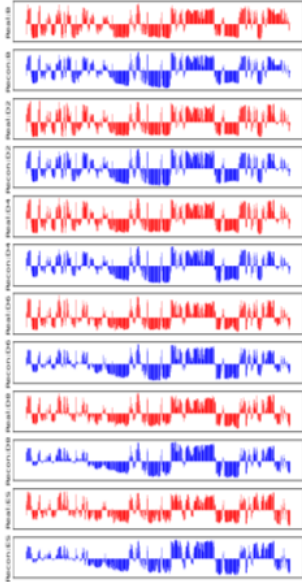



Chro 13

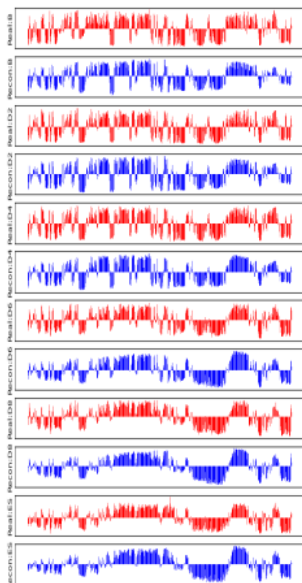

Chro 14

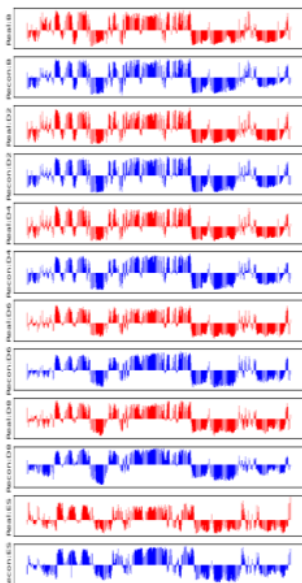

Chro 15

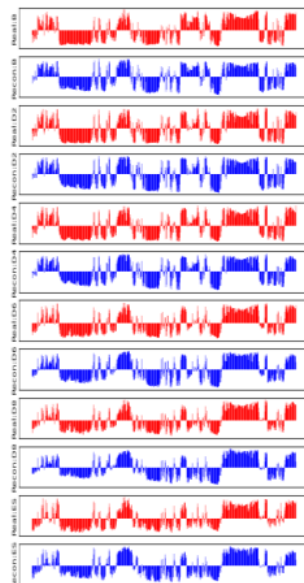

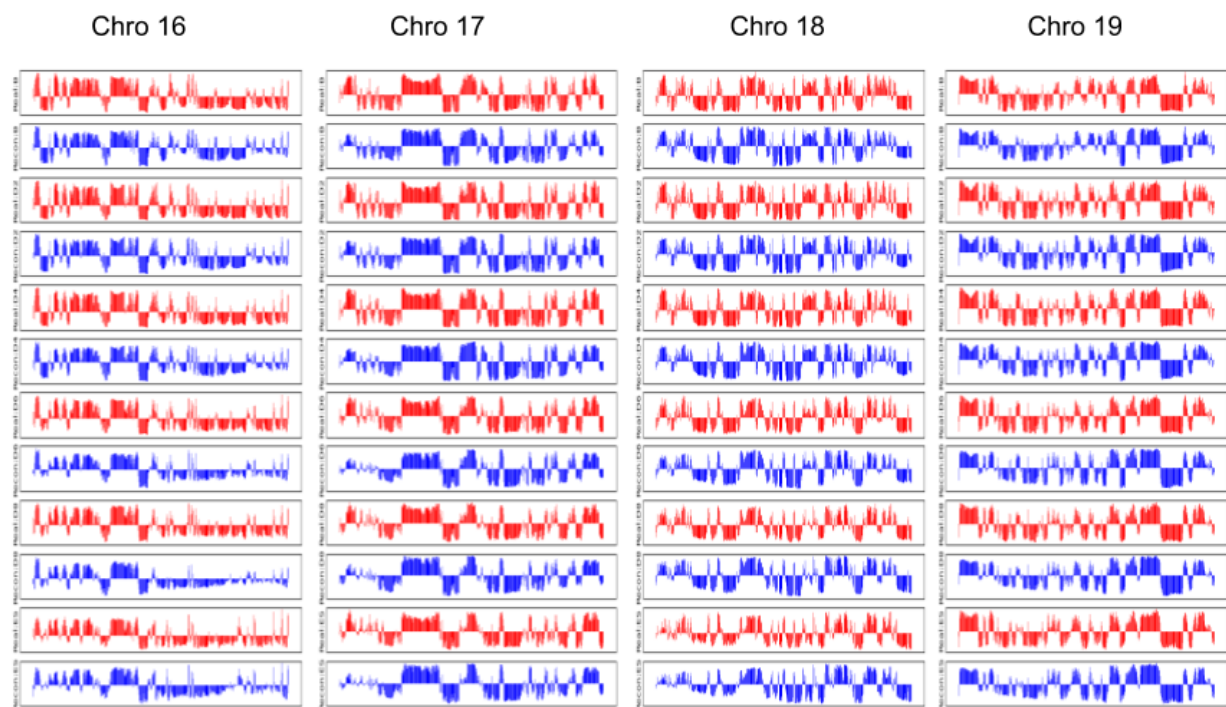

Figure S13 Pearson Mats

Plots of AB compartment assignments (red) biological Hi-C (blue) reconstructed Hi-C contacts.

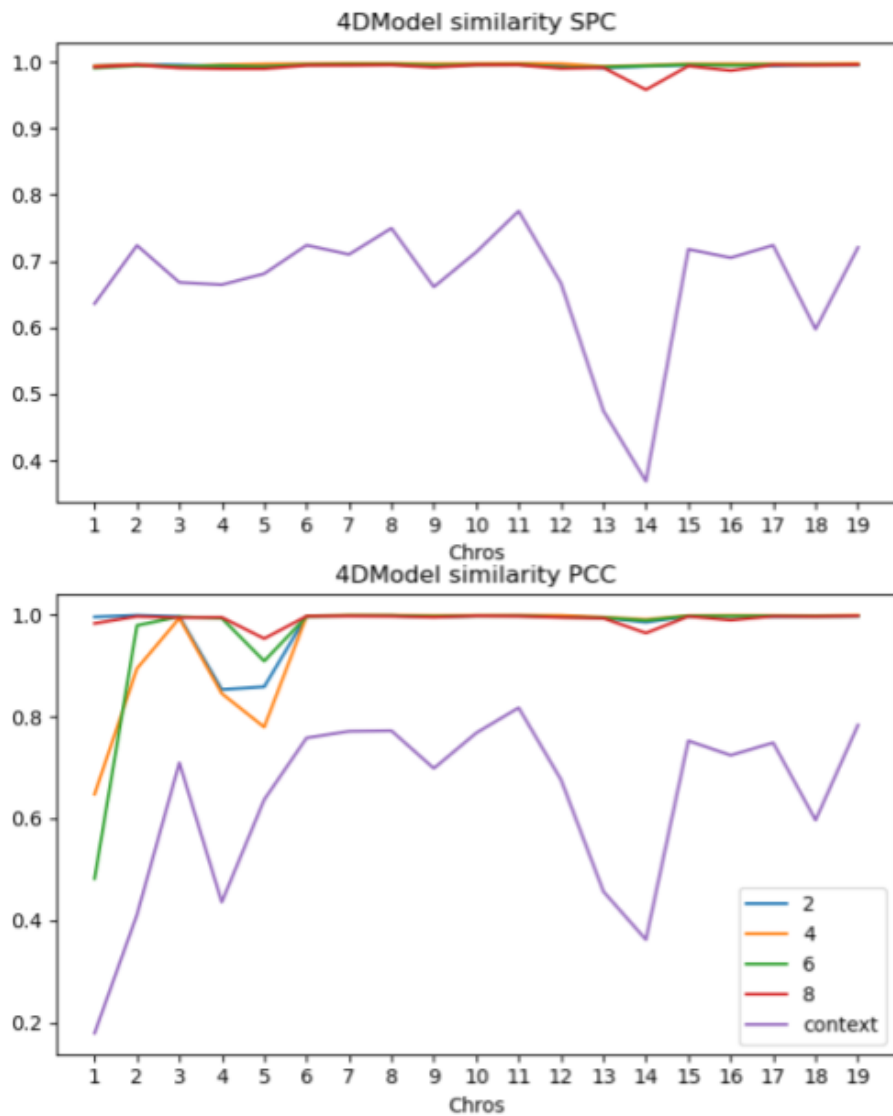

**Figure S14 4D Model Similarity of Interpolated iPSC and Full iPSC Models**

Avg spearman and pearson correlation between distance vectors of structural conformation at all time points of full cardiomyocyte structures and interpolation structures. The context metrics show the correlation between distance vectors for the structural conformation at the beginning and end of an interpolation structure. This indicated consistently higher similarity between two 4D structures at each time than between a 4D structures starting and ending conformation.

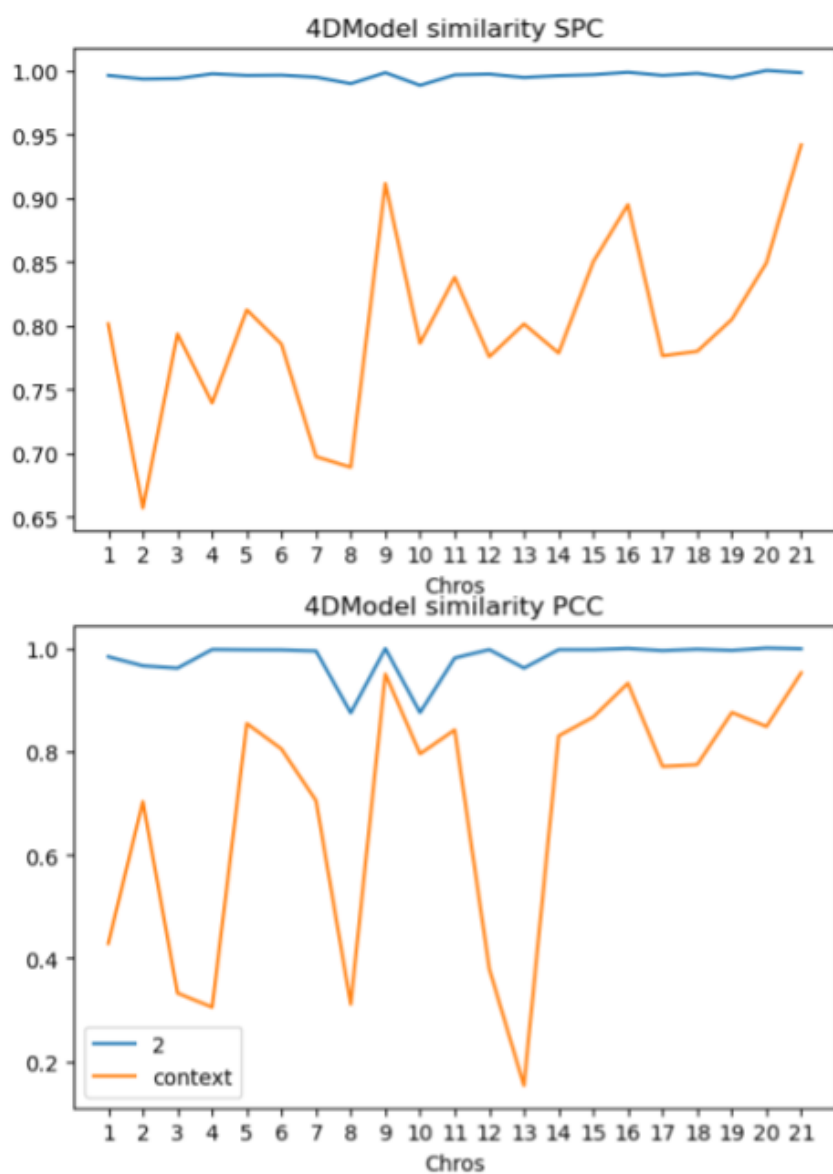

Figure S15 4D Model Similarity of Interpolated Cardio and Cull Cardio

Avg spearman and pearson correlation between distance vectors of structural conformation at all time points of full cardiomyocyte structures and interpolation structures. The context metrics show the correlation between distance vectors for the structural conformation at the beginning and end of an interpolation structure. This indicated consistently higher similarity between two 4D structures at each time than between a 4D structures starting and ending conformation.

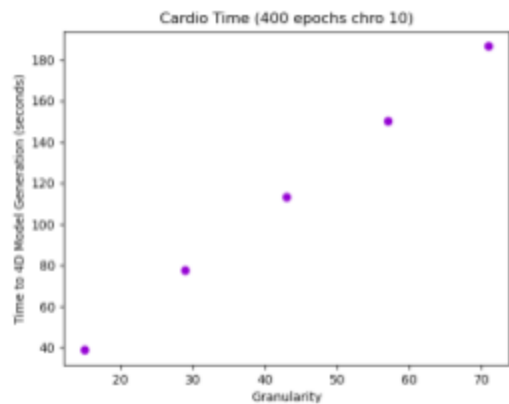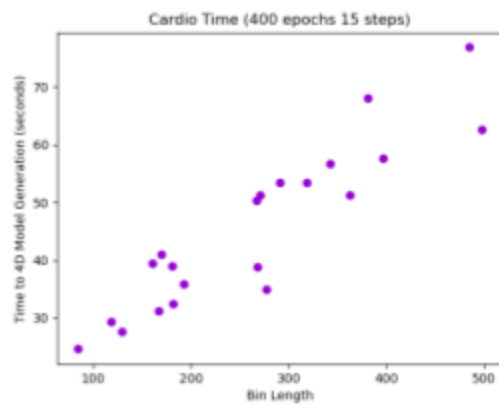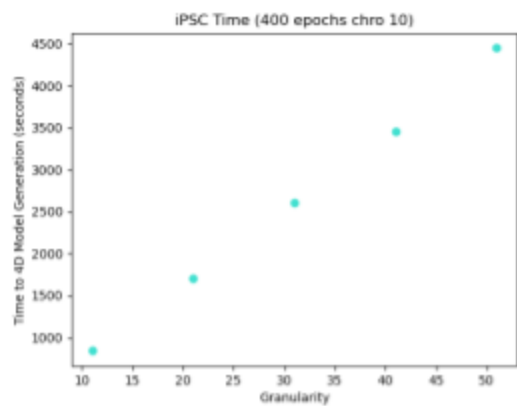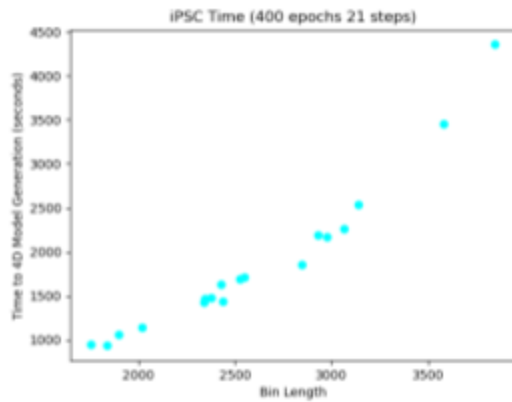

Figure S16 Run Time

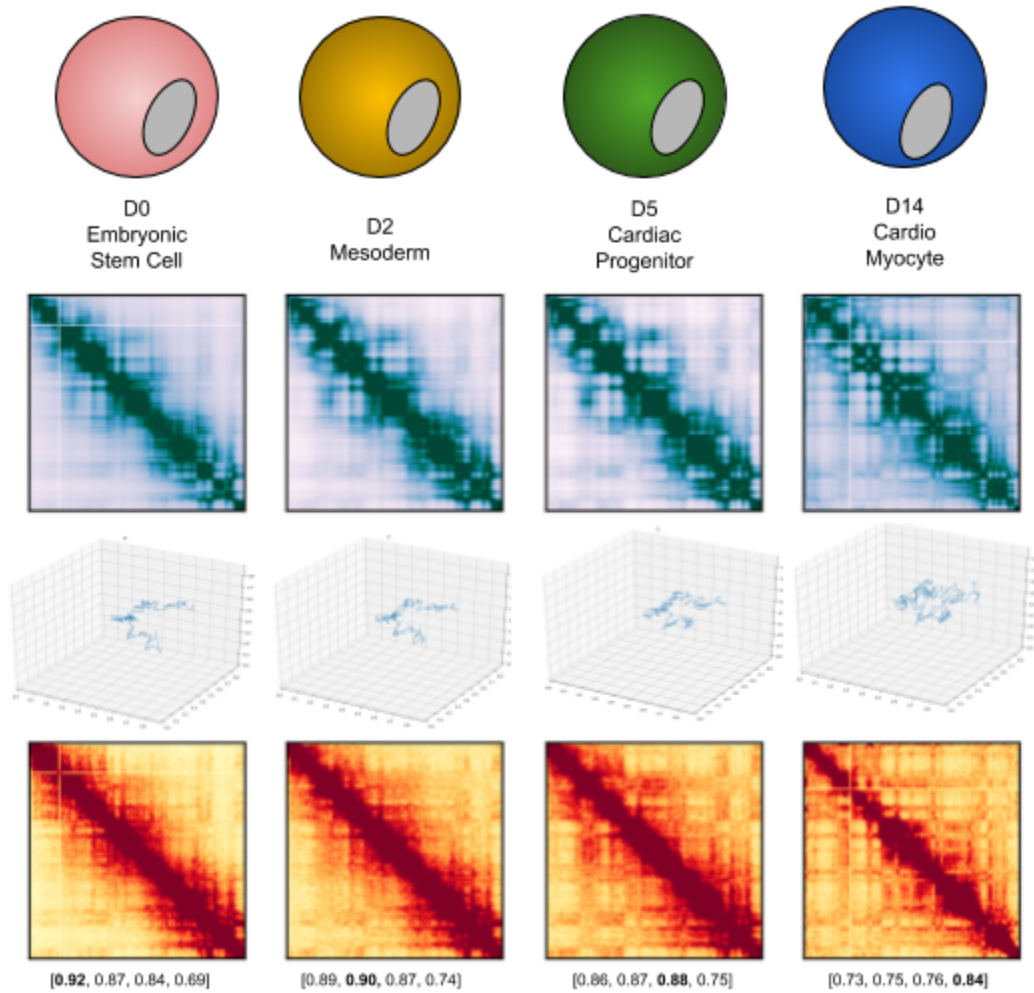

Figure S17 Cardio Schematic

Chromosome 13. (a) Days Hi-C experiments are taken. (b) Hi-C contact matrices © reconstructed structure (4) Reconstructed Contact maps

Day B

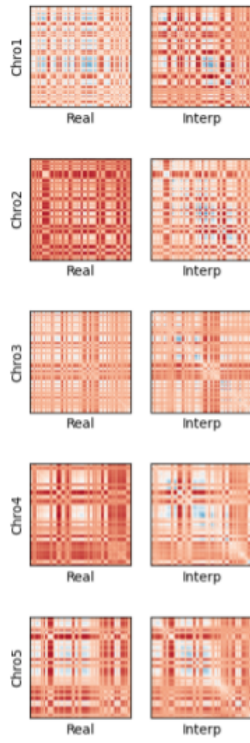

Day B

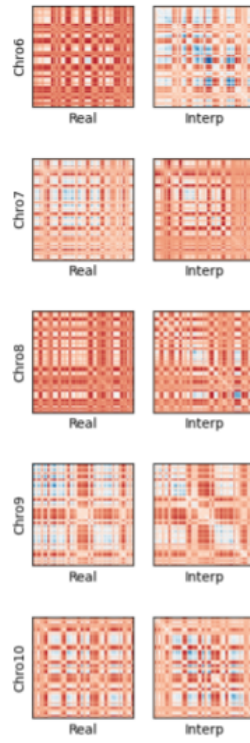

Day B

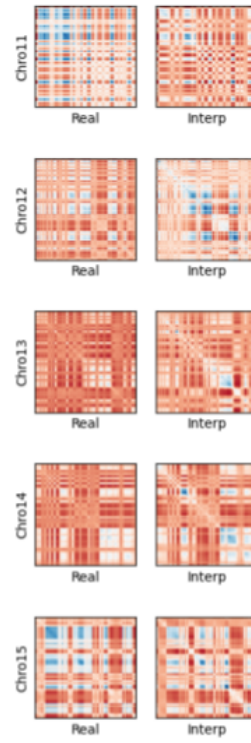

Day B

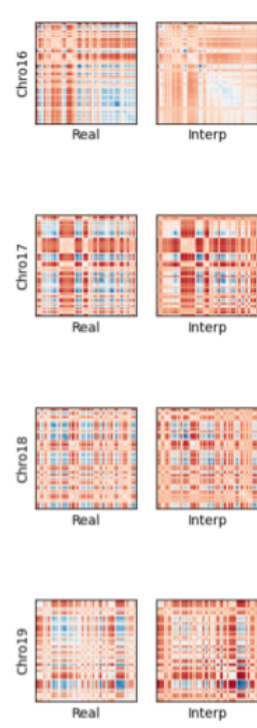

Day D2

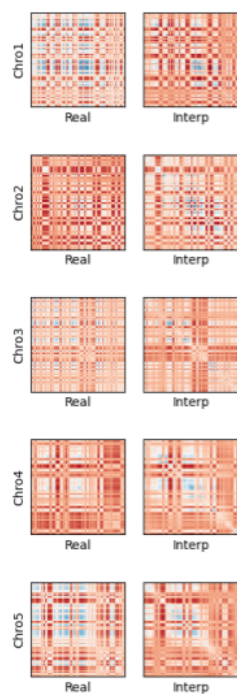

Day D2

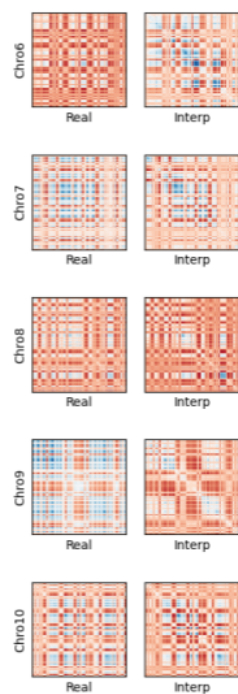

Day D2

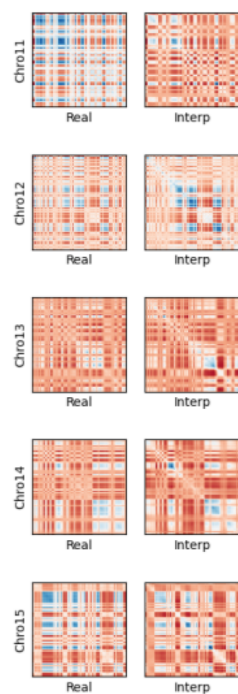

Day D2

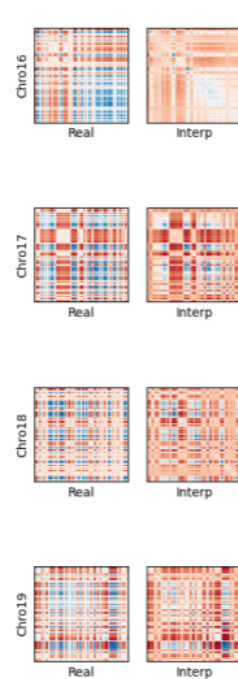



Day D4

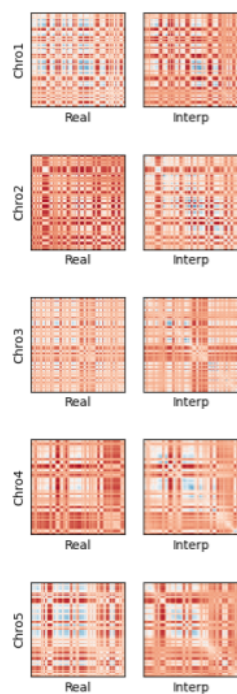

Day D4

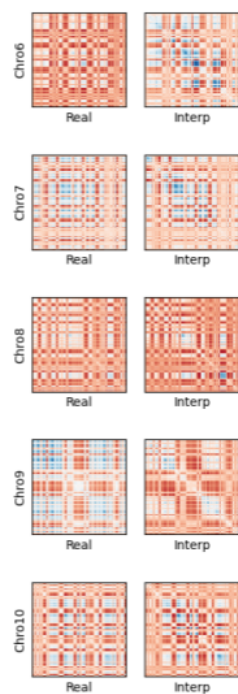

Day D4

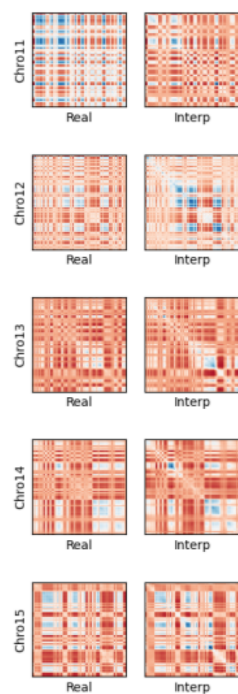

Day D4

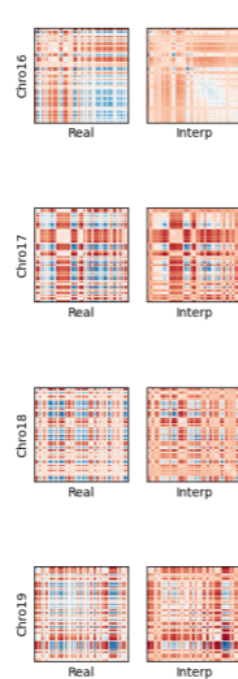

Day D6

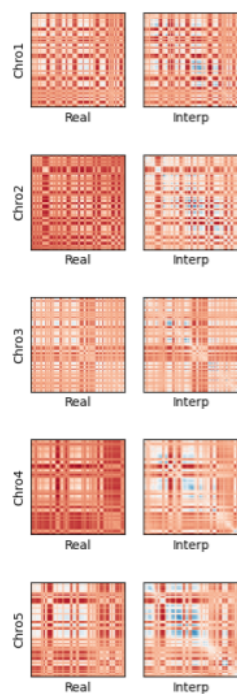

Day D6

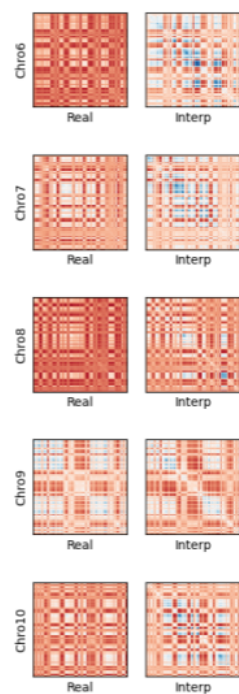

Day D6

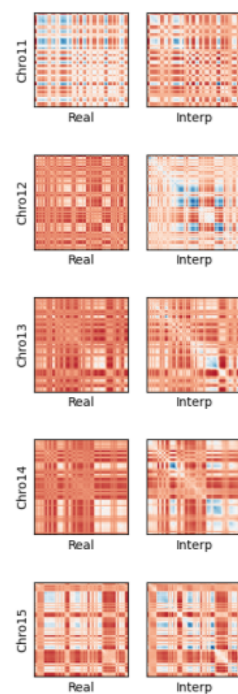

Day D6

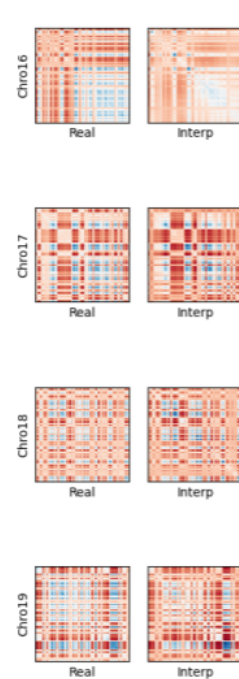

Day D8

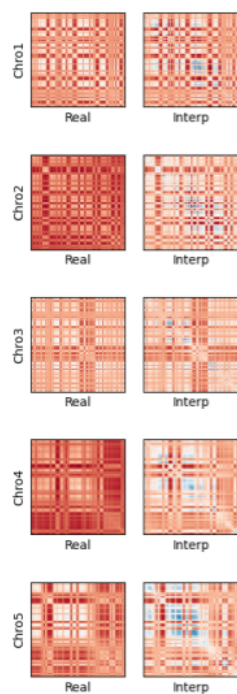

Day D8

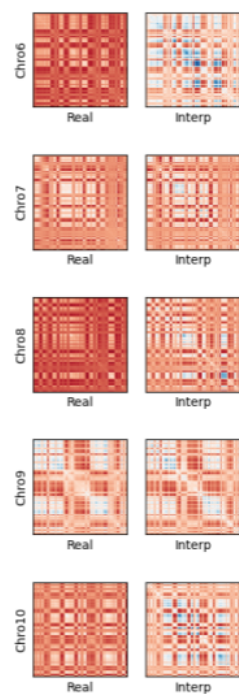

Day D8

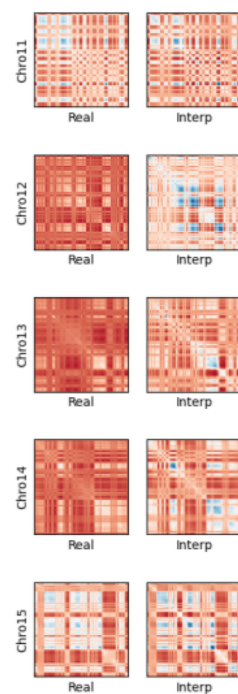

Day D8

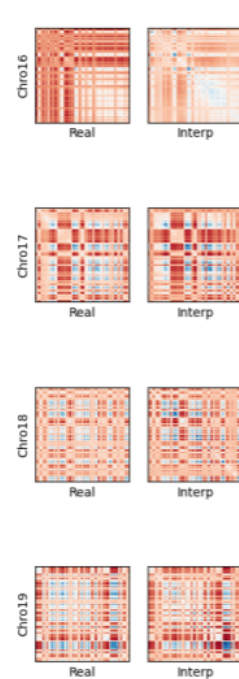

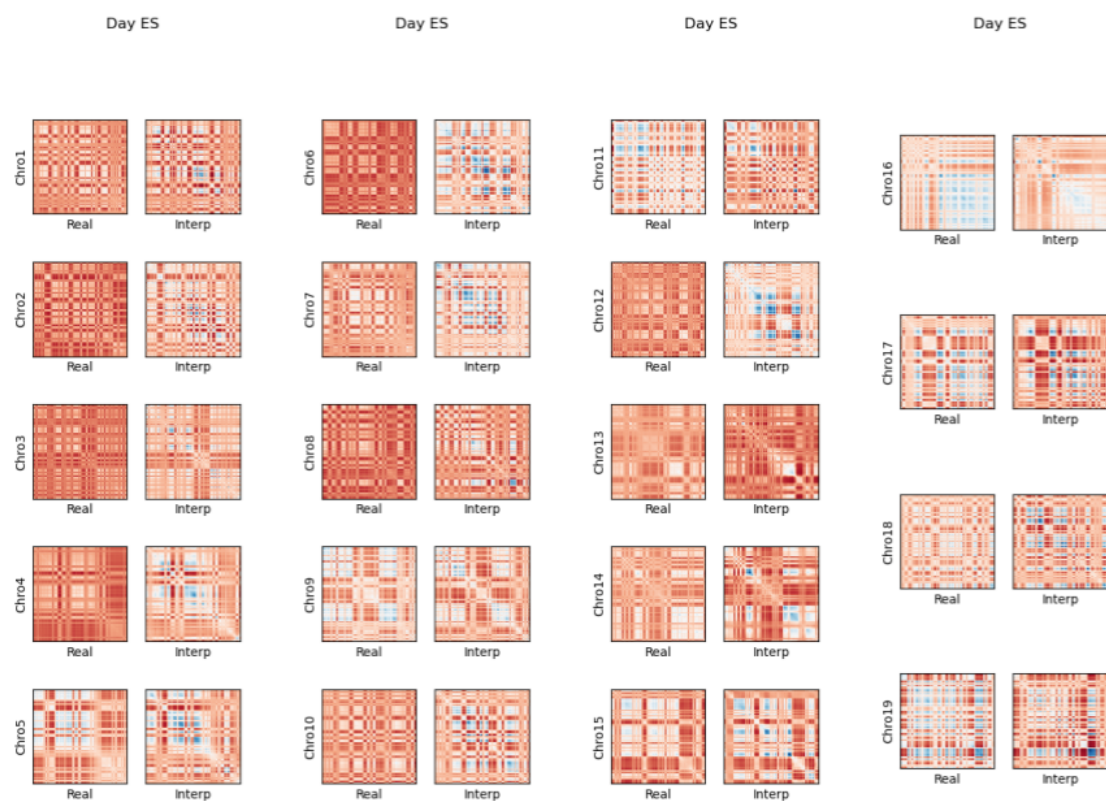

Figure S18 AB Vec Pearson Matrices

AB compartments Pearson correlation matrices for (left) real Hi-C and (right) reconstructed Hi-C data.

| # eta   | lr       | alpha | avg_ pcc |
|---------|----------|-------|----------|
| 1       | 1.00E-01 | 0.6   | -0.0317  |
| 1       | 1.00E-01 | 0.8   | -0.0358  |
| 1       | 1.00E-01 | 1     | -0.038   |
| 1       | 1.00E-03 | 0.6   | -0.0017  |
| 1       | 1.00E-03 | 0.8   | -0.0035  |
| 1       | 1.00E-03 | 1     | -0.0071  |
| 1       | 1.00E-04 | 0.6   | 0.7492   |
| 1       | 1.00E-04 | 0.8   | 0.7162   |
| 1       | 1.00E-04 | 1     | 0.6774   |
| 1       | 1.00E-05 | 0.6   | 0.354    |
| 1       | 1.00E-05 | 0.8   | 0.4005   |
| 1       | 1.00E-05 | 1     | 0.4323   |
| 1000    | 1.00E-01 | 0.6   | nan      |
| 1000    | 1.00E-01 | 0.8   | nan      |
| 1000    | 1.00E-01 | 1     | nan      |
| 1000    | 1.00E-03 | 0.6   | -0.2323  |
| 1000    | 1.00E-03 | 0.8   | -0.1823  |
| 1000    | 1.00E-03 | 1     | -0.1452  |
| 1000    | 1.00E-04 | 0.6   | 0.7493   |
| 1000    | 1.00E-04 | 0.8   | 0.7166   |
| 1000    | 1.00E-04 | 1     | 0.6769   |
| 1000    | 1.00E-05 | 0.6   | 0.3546   |
| 1000    | 1.00E-05 | 0.8   | 0.4209   |
| 1000    | 1.00E-05 | 1     | 0.4741   |
| 1000000 | 1.00E-01 | 0.6   | nan      |
| 1000000 | 1.00E-01 | 0.8   | nan      |
| 1000000 | 1.00E-01 | 1     | nan      |
| 1000000 | 1.00E-03 | 0.6   | nan      |
| 1000000 | 1.00E-03 | 0.8   | nan      |
| 1000000 | 1.00E-03 | 1     | nan      |
| 1000000 | 1.00E-04 | 0.6   | nan      |
| 1000000 | 1.00E-04 | 0.8   | nan      |

|         |          |     |        |
|---------|----------|-----|--------|
| 1000000 | 1.00E-04 | 1   | nan    |
| 1000000 | 1.00E-05 | 0.6 | 0.252  |
| 1000000 | 1.00E-05 | 0.8 | 0.2787 |
| 1000000 | 1.00E-05 | 1   | 0.2924 |

Figure S19 Hyper Parameter Tuning

| # Day | Chro | Numerical<br>Interp | 4DMax recon | 4DMax interp |
|-------|------|---------------------|-------------|--------------|
| D2    |      | 1                   | 0.734       | 0.777        |
| D4    |      | 1                   | 0.712       | 0.732        |
| D6    |      | 1                   | 0.663       | 0.693        |
| D2    |      | 2                   | 0.751       | 0.785        |
| D4    |      | 2                   | 0.727       | 0.758        |
| D6    |      | 2                   | 0.685       | 0.727        |
| D2    |      | 3                   | 0.756       | 0.798        |
| D4    |      | 3                   | 0.733       | 0.76         |
| D6    |      | 3                   | 0.685       | 0.726        |
| D2    |      | 4                   | 0.764       | 0.794        |
| D4    |      | 4                   | 0.742       | 0.769        |
| D6    |      | 4                   | 0.693       | 0.721        |
| D2    |      | 5                   | 0.772       | 0.804        |
| D4    |      | 5                   | 0.747       | 0.773        |
| D6    |      | 5                   | 0.693       | 0.712        |
| D2    |      | 6                   | 0.748       | 0.785        |
| D4    |      | 6                   | 0.729       | 0.761        |
| D6    |      | 6                   | 0.677       | 0.699        |
| D2    |      | 7                   | 0.775       | 0.8          |
| D4    |      | 7                   | 0.748       | 0.769        |
| D6    |      | 7                   | 0.698       | 0.703        |
| D2    |      | 8                   | 0.764       | 0.801        |
| D4    |      | 8                   | 0.741       | 0.772        |
| D6    |      | 8                   | 0.682       | 0.697        |
| D2    |      | 9                   | 0.763       | 0.797        |
| D4    |      | 9                   | 0.732       | 0.763        |
| D6    |      | 9                   | 0.667       | 0.692        |
| D2    |      | 10                  | 0.764       | 0.802        |
| D4    |      | 10                  | 0.739       | 0.77         |
| D6    |      | 10                  | 0.688       | 0.72         |
| D2    |      | 11                  | 0.791       | 0.813        |
| D4    |      | 11                  | 0.764       | 0.785        |

|    |    |       |       |       |
|----|----|-------|-------|-------|
| D6 | 11 | 0.716 | 0.767 | 0.741 |
| D2 | 12 | 0.746 | 0.815 | 0.776 |
| D4 | 12 | 0.715 | 0.756 | 0.743 |
| D6 | 12 | 0.661 | 0.721 | 0.681 |
| D2 | 13 | 0.716 | 0.779 | 0.742 |
| D4 | 13 | 0.689 | 0.72  | 0.712 |
| D6 | 13 | 0.639 | 0.7   | 0.674 |
| D2 | 14 | 0.732 | 0.808 | 0.774 |
| D4 | 14 | 0.707 | 0.752 | 0.744 |
| D6 | 14 | 0.645 | 0.712 | 0.677 |
| D2 | 15 | 0.781 | 0.834 | 0.802 |
| D4 | 15 | 0.76  | 0.792 | 0.78  |
| D6 | 15 | 0.709 | 0.762 | 0.704 |
| D2 | 16 | 0.789 | 0.842 | 0.807 |
| D4 | 16 | 0.773 | 0.8   | 0.786 |
| D6 | 16 | 0.721 | 0.769 | 0.718 |
| D2 | 17 | 0.79  | 0.837 | 0.803 |
| D4 | 17 | 0.771 | 0.796 | 0.784 |
| D6 | 17 | 0.712 | 0.752 | 0.702 |
| D2 | 18 | 0.766 | 0.816 | 0.782 |
| D4 | 18 | 0.737 | 0.772 | 0.751 |
| D6 | 18 | 0.673 | 0.73  | 0.658 |
| D2 | 19 | 0.802 | 0.835 | 0.794 |
| D4 | 19 | 0.791 | 0.808 | 0.781 |
| D6 | 19 | 0.746 | 0.781 | 0.702 |

Figure S20 Performance Comparison to Numerical Interpolation



## Videos

Videos are stored as gif files and are available:

<http://sysbio.rnet.missouri.edu/3dgenome/4DMax/>

### S1 Video Collection 1 Synthetic Videos

<http://sysbio.rnet.missouri.edu/3dgenome/4DMax/Movies%201%20Synthetic.zip>

### S2 Video Collection 2 iPSC Videos

<http://sysbio.rnet.missouri.edu/3dgenome/4DMax/Movies%202%20iPSC%20Full.zip>

### S3 Video Collection 3 Cardio Videos

<http://sysbio.rnet.missouri.edu/3dgenome/4DMax/Movies%203%20Cardio%20Videos.zip>

### S4 Video Collection 4 iPSC Missing Chros

<http://sysbio.rnet.missouri.edu/3dgenome/4DMax/Movies%204%20iPSC%20Missing.zip>

### S5 Video Collection 5 Cardio Missing Chros

<http://sysbio.rnet.missouri.edu/3dgenome/4DMax/Movies%205%20Cardio%20Missing%20Chros.zip>

### S6 Video Collection 6 Changing Resolution

<http://sysbio.rnet.missouri.edu/3dgenome/4DMax/Movies%206%20Changing%20Resolution.zip>

### S7 Video Collection 7 Changing Granularity

<http://sysbio.rnet.missouri.edu/3dgenome/4DMax/Movies%207%20Changin%20Granularity.zip>

### S8 Video Collection 8 Changing Granularity

<http://sysbio.rnet.missouri.edu/3dgenome/4DMax/Movies%208%20Hyper%20Param.zip>
